1 **Nitrate-dependent salt tolerance mediated by OsNLP4-OsMADS27 module**

2 Alamin Alfatih<sup>1</sup>, Jing Zhang<sup>1</sup>, Ying Song<sup>1</sup>, Sami Ullah Jan<sup>1</sup>, Zi-Sheng Zhang, Jing-Qiu Xia,  
3 Zheng-Yi Zhang, Tahmina Nazish, Jie Wu, Ping-Xia Zhao, and Cheng-Bin Xiang

4  
5 Division of Life Sciences and Medicine; Division of Molecular & Cell Biophysics, Hefei  
6 National Science Center for Physical Sciences at the Microscale; MOE Key Laboratory for  
7 Membraneless Organelles and Cellular Dynamics; University of Science and Technology of  
8 China, The Innovation Academy of Seed Design, Chinese Academy of Sciences, Hefei, Anhui  
9 Province 230027, China

10

11 <sup>1</sup>These authors contributed equally.

12

13 Correspondence:

14 Cheng-Bin Xiang (email: [xiangcb@ustc.edu.cn](mailto:xiangcb@ustc.edu.cn), 86-55163600429)

15 Ping-Xia Zhao (email: [zhaopingxia2008@163.com](mailto:zhaopingxia2008@163.com))

16 Jie Wu (email: [wujie199104@163.com](mailto:wujie199104@163.com))

17

18

19 **Abstract**

20 Salt stress is a major constraint of plant growth and yield. Nitrogen (N) fertilizers are known  
21 to alleviate salt stress. However, the underlying molecular mechanisms remain unclear. Here we  
22 show that OsNLP4-OsMADS27 module controls nitrate-dependent salt tolerance in rice. The  
23 expression of *OsMADS27* is specifically induced by nitrate. The *OsMADS27* knockout mutants  
24 are more sensitive to salt stress than the wild type, whereas the *OsMADS27* overexpression lines  
25 are more tolerant. Transcriptomic analyses revealed that *OsMADS27* controls the expression of a  
26 number of known stress-responsive genes as well as those involved in ion homeostasis and  
27 antioxidation. We demonstrated that *OsMADS27* directly binds to the promoter of *OsHKT1.1*  
28 and *OsSPL7* to regulate their expression. Notably, *OsMADS27*-mediated salt tolerance is nitrate-  
29 dependent and positively correlated with nitrate concentration. We further showed that OsNLP4,  
30 a nitrate-responsive key regulator in N metabolism and N use efficiency, positively regulates the  
31 expression of *OsMADS27* by directly binding to the nitrate-responsive *cis*-element in its  
32 promoter, thereby transmitting the nitrate signal to *OsMADS27* and conferring its nitrate  
33 dependence. Our results reveal the role of nitrate-responsive OsNLP4-OsMADS27 module and  
34 its downstream target genes in salt tolerance, filling the gap in the molecular mechanism of  
35 nitrate-dependent salt tolerance of rice. Moreover, *OsMADS27* overexpression increased grain  
36 yield under salt stress in presence of sufficient nitrate, indicating that *OsMADS27* is a promising  
37 candidate for the improvement of salt tolerance in rice.

38 **Keywords:** OsMADS27, OsNLP4, nitrate-dependent salt tolerance, salt stress, grain yield

39

## 40 **Introduction**

41 Salinity lies among critical crises in agriculture around the globe and the majority of the  
42 food crops are salinity-sensitive (Qadir et al., 2014). Elevated soil salinity not only causes ion  
43 toxicity and osmotic stress, but also results in severe nutrient deficiency in plants (Munns and  
44 Tester, 2008). To cope with the salinity-triggered damages, plants have evolved various  
45 strategies on the bases of their habitat and severity of stress (Adem et al., 2014; Ashraf et al.,  
46 2008; Bose et al., 2014; Chakraborty et al., 2016). Among numerous strategies, appropriate  
47 acquisition of the mineral nutrients is undoubtedly an effective way to improve salinity tolerance,  
48 growth and yield under salt stress (Gao et al., 2016; Guo et al., 2017; Kaya et al., 2007).  
49 Therefore, it is important to understand the mechanisms by which nutrients alleviate salt stress in  
50 plants for breeding robust salt-tolerant crop varieties.

51 Potassium, a vital nutrient for plant growth and development, is well known for its role in  
52 balancing sodium concentration in plants (Clarkson and Hanson, 1980; Raddatz et al., 2020; Wu  
53 et al., 2018; Zorb et al., 2014). Under salt stress, the accumulation of sodium ions ( $\text{Na}^+$ ) in the  
54 cytoplasm leads to membrane depolarization and promotes potassium ions ( $\text{K}^+$ ) leakage out of  
55 the cell. Therefore, it is crucial for plants to maintain an appropriate  $\text{K}^+/\text{Na}^+$  ratio in the  
56 cytoplasm to survive in saline soil, which depends on the operation of  $\text{Na}^+/\text{K}^+$  transporters (Wu  
57 et al., 2018). Rice potassium transporter OsHAK1 promotes  $\text{K}^+$  uptake and  $\text{K}^+/\text{Na}^+$  ratio in both  
58 low and high potassium conditions, which is essential for maintaining potassium-mediated  
59 growth and salt tolerance (Chen et al., 2015). Rice shaker  $\text{K}^+$  channel OsAKT2 mediates  $\text{K}^+$   
60 recirculation from shoots to roots to maintain  $\text{Na}^+/\text{K}^+$  homeostasis and improve salt tolerance  
61 (Tian et al., 2021). Moreover, the members of high-affinity  $\text{K}^+$  transporters like HKTs also grant  
62 salinity tolerance to rice (Hamamoto et al., 2015; Rosas-Santiago et al., 2015; Suzuki et al.,  
63 2016a; Wang et al., 2015). Calcium ( $\text{Ca}^{2+}$ ) can regulate the perception, uptake, and transport of  
64 various ions through the SOS (salt overly sensitive) pathway (Lin et al., 2009; Qiu et al., 2002;  
65 Yang and Guo, 2018a; Yang and Guo, 2018b; Zhu et al., 1998), thereby coordinating  $\text{Na}^+/\text{K}^+$   
66 homeostasis in plants (Asano et al., 2012; Campo et al., 2014; Manishankar et al., 2018). The  
67  $\text{Na}^+/\text{H}^+$  antiporter SOS1 in cell membrane is associated with  $\text{Na}^+$  extrusion via roots under saline  
68 environment and confers salinity tolerance to rice (Martínez-Atienza et al., 2007). *SOS2* and  
69 *SOS3*, encoding protein kinase and  $\text{Ca}^{2+}$ -binding protein respectively, are required for salinity

70 tolerance in rice because they perceive the change of  $\text{Ca}^{2+}$  in cytosol under salinity and activate  
71 several downstream genes to start signaling cascade (Kumar et al., 2013).

72 Apart from potassium, few mineral nutrients have been studied for their roles in salt  
73 tolerance. Sulfur nutrient has been found to improve plant photosynthesis and growth under salt  
74 stress by increasing glutathione production and abscisic acid (ABA) accumulation (Cao et al.,  
75 2014; Chen et al., 2019; Fatma et al., 2014; Fatma et al., 2021). Nitrogen (N), an essential  
76 macronutrient for plants, has been shown to improve salt tolerance (Mansour, 2000) via its  
77 participation in stimulation of the antioxidation (Rais et al., 2013), osmotic adjustment (Nasab et  
78 al., 2014), maintenance of ion balance (Khan et al., 2016b), mitigation of ionic toxicity (Iqbal et  
79 al., 2015), and the activation of numerous enzymes (Aragao et al., 2012). However, the  
80 underlying molecular mechanisms of N-improved salt tolerance in plants remain unclear to date.

81 Transcription factors (TFs) play essential roles in transcriptional control of the stress-  
82 associated genes and hence are of utmost importance for breeding stress-tolerant crops  
83 (Ahammed et al., 2020; Zhang et al., 2017). The MADS family TFs control important growth  
84 and developmental processes such as seed germination and flowering time (Chen et al., 2016;  
85 Moyle et al., 2005; Wu et al., 2017; Yin et al., 2019; Yu et al., 2017). MADS-box TFs are also  
86 involved in the response to various abiotic stress. For example, *OsMADS26* is a negative  
87 regulator of drought stress tolerance in rice (Khong et al., 2015). *OsMADS57* in concert with  
88 *OsTBI* mediates the transcription of *OsWRKY94* to confer cold tolerance in rice (Chen et al.,  
89 2018b). Moreover, *OsMADS25*, *OsMADS27* and *OsMADS57* are involved in the response to  
90 nutrient deficiency in rice (Chen et al., 2018a; Huang et al., 2019; Yu et al., 2015). The  
91 overexpression of *OsMADS25* improved the salinity tolerance of rice (Wu et al., 2020).

92 We previously reported *Arabidopsis* MADS-box TF *AtAGL16* as a negative regulator of salt  
93 and drought tolerance (Zhao et al., 2020; Zhao et al., 2021). To extend our work to rice, we  
94 identified *OsMADS27* as the most homologous gene of *AtAGL16*. *OsMADS27* is induced by  
95 nitrate ( $\text{NO}_3^-$ ) and ABA, and acts as a target gene of miR444 to control root development in a  
96  $\text{NO}_3^-$ -dependent manner (Chen et al., 2018a; Pachamuthu et al., 2022; Puig et al., 2013; Yu et al.,  
97 2014). When overexpressed, *OsMADS27* confers enhanced salt tolerance in transgenic seedlings  
98 (Chen et al., 2018a). However, the molecular mechanism underlying *OsMADS27*-mediated salt  
99 tolerance remains unclear. Likewise, the relation of *OsMADS27*-mediated salt tolerance to N

100 nutrient has not been investigated in rice. In this study, we discovered the  $\text{NO}_3^-$  dependence of  
101 *OsMADS27*-mediated salt tolerance and unveiled the underlying molecular mechanism. Our  
102 results demonstrate that *OsMADS27*-mediated salt tolerance is  $\text{NO}_3^-$ -dependent. The OsNLP4-  
103 OsMADS27 module plays a key role in the  $\text{NO}_3^-$ -dependent salt tolerance, where OsNLP4  
104 senses  $\text{NO}_3^-$  signaling, translocates to the nucleus (Konishi and Yanagisawa, 2010; Wu et al.,  
105 2021), and transcriptionally upregulates *OsMADS27*. Consequently, OsMADS27 directly  
106 regulates the expression of stress-responsive genes in rice. Therefore, our findings revealed a  
107 novel mechanism of  $\text{NO}_3^-$ -dependent salt tolerance, which can be exploited for the improvement  
108 of salinity tolerance in crops.

## 109 **Results**

### 110 **Expression of *OsMADS27* is specifically induced by nitrate and NaCl-induced expression of** 111 ***OsMADS27* is nitrate-dependent**

112 To gain a detailed expression pattern of *OsMADS27*, we examined its spatiotemporal  
113 expression by quantitative real time PCR (qRT-PCR) at three developmental stages of rice  
114 plants: seedling, vegetative, and pre-mature stage. Our results demonstrated that *OsMADS27* was  
115 expressed in all the tissues examined but with much higher levels in roots, leaves, and sheath  
116 (Fig. S1A). In addition, tissue expression pattern of *OsMADS27* was revealed in the  
117 *OsMADS27pro::GUS* transgenic plants (Fig. S1B), which was reconcilable with our qRT-PCR  
118 results and previous reports (Chen et al., 2018a; Pachamuthu et al., 2022; Puig et al., 2013; Yu et  
119 al., 2014). Notably, strong GUS signal was detected in the stela of the root (Fig. S1B).

120 To check the response of *OsMADS27* to nutrients and salt stress, we grew wild type (WT)  
121 seedlings under normal conditions and then transferred 7-day-old seedlings to hydroponic  
122 medium without N for 48 hours, then transferred the seedlings to hydroponic medium  
123 supplemented with 2 mM  $\text{KNO}_3$ , 2 mM  $\text{NH}_4\text{Cl}$ , 2 mM KCl, or 150 mM NaCl, respectively.  
124 Surprisingly, NaCl did not induce the expression of *OsMADS27* under our conditions, neither did  
125  $\text{NH}_4\text{Cl}$  or KCl. Only  $\text{KNO}_3$  induced the expression of *OsMADS27* that plateaued at 12 hours  
126 with about 5 folds increase (Fig. 1A). In addition, we showed that when the seedlings were  
127 transferred into N-free medium, the  $\text{KNO}_3$ -induced expression of *OsMADS27* was gradually

128 decreased (Fig. 1B). These results clearly show that the expression of *OsMADS27* is specifically  
129 responsive to  $\text{KNO}_3$ .

130 Meanwhile, we showed that under normal growth conditions, NaCl and ABA induced the  
131 expression of *OsMADS27* (Fig. S1C-E), which was inconsistent with the results of NaCl  
132 treatment in Fig. 1A. The only difference of these experiments lies in whether nitrate is present  
133 in the NaCl treatment, which likely counts for this observed difference of *OsMADS27*  
134 expression. To confirm this, we treated seedling (N starved) under 150 mM NaCl with 0 mM  
135  $\text{KNO}_3$  for 3 hours, then added 2 mM  $\text{KNO}_3$  for another 3 hour. The qRT-PCR results clearly  
136 show that in the absence of  $\text{KNO}_3$ , NaCl was unable to induce the expression of *OsMADS27*.  
137 Only in the presence of  $\text{KNO}_3$ , NaCl stimulated the expression of *OsMADS27* (Fig. 1C). This  
138 was further confirmed with *OsMADS27pro::GUS* transgenic rice in which GUS signal exhibited a  
139 similar response. No change in GUS activity was observed under the treatment of KCl plus  
140 NaCl, while a strong induction of GUS was seen in roots treated with  $\text{KNO}_3$  plus NaCl (Fig. 1D  
141 and E).

142 We also quantified the protein level of OsMADS27 in the *OsMADS27pro::OsMADS27-GFP*  
143 plants by western blot using anti-GFP antibodies under low, normal, and high concentration of  
144  $\text{KNO}_3$  (0.02 mM, 0.2 mM, and 2mM) with or without 100 mM of NaCl for 10 days. The results  
145 in Fig. 1F show that the OsMADS27 protein level is positively correlated with  $\text{KNO}_3$   
146 concentration and enhanced by NaCl treatment (Fig. 1F).

147 Taken together, our results clearly show that the expression of *OsMADS27* is specifically  
148 induced by  $\text{NO}_3^-$  and NaCl-induced expression of *OsMADS27* is  $\text{NO}_3^-$ -dependent.

#### 149 **Nuclear localization of OsMADS27 is responsive to nitrate**

150 To reveal the subcellular localization of OsMADS27 protein and its response to nutrients,  
151 we generated *OsMADS27pro::OsMADS27-GFP* transgenic lines. The transgenic plants were  
152 grown on N-free MS medium supplied with 2 mM  $\text{KNO}_3$  (Fig. 2A) or 2 mM KCl (Fig. 2C) for  
153 10 days. Then seedlings receiving  $\text{KNO}_3$  were treated with 150 mM NaCl (Fig. 2B), and the  
154 seedlings receiving KCl were treated with 2 mM  $\text{KNO}_3$  (Fig. 2D), 2 mM  $\text{NH}_4\text{Cl}$  (Fig. 2E), 150  
155 mM NaCl (Fig. 2F), and 150 mM NaCl plus 2 mM  $\text{KNO}_3$  (Fig. 2G) respectively for 60 min  
156 before confocal laser-scanning microscopic observation. GFP signals were detected in the

157 nucleus whenever  $\text{KNO}_3$  was included in the medium regardless of the presence of other  
158 supplements (Fig. 2A, B, D and G). No GFP signals were detected in the presence of KCl (Fig.  
159 2C), KCl plus  $\text{NH}_4\text{Cl}$  (Fig. 2E), or KCl plus NaCl (Fig. 2F). These results indicate that the  
160 nuclear accumulation of OsMADS27 is specifically responsive to nitrate, in accordance with that  
161 of OsNLP4 (Wu et al., 2021).

### 162 ***OsMADS27*-mediated salt tolerance in rice is nitrate-dependent**

163 To explore the capability of *OsMADS27* in conferring salt tolerance to rice, we generated  
164 two independent loss-of-function mutant lines of *OsMADS27* (KO1 and KO2) by using  
165 CRISPR/CAS9-based editing. Protein sequence alignment depicted that mutations in both  
166 mutants resulted in premature stop codon, hence interrupting the open reading frame (ORF) of  
167 *OsMADS27* (Fig. S2A-D). Additionally, we generated two independent overexpression (OE)  
168 lines of *OsMADS27* (OE7 and OE8) driven by *OsACTIN1* promoter (Fig. S2E-F).

169 To evaluate the role of *OsMADS27* in salt stress tolerance of rice, we germinated the seeds  
170 of OE7, OE8, KO1, KO2, and WT in soil in the presence of 0 mM or 150 mM NaCl. Under 0  
171 mM NaCl conditions, there was no difference in germination rate among all the genotypes (Fig.  
172 S3A). However, under 150 mM salt stress, OE lines displayed a germination rate of 80% at day 6  
173 compared with WT and KO mutants which exhibited a germination rate of 55% and 30%  
174 respectively (Fig. S3B). Moreover, we conducted salt tolerance assay on soil-grown seedlings  
175 (Fig. S3C). Upon treatment of 20-day-old soil-grown seedlings with 150 mM NaCl for 15 days,  
176 80% of the OE plants survived compared with WT and KO mutants with a survival ratio of 43%  
177 and 12% respectively, whereas under the 0 mM NaCl control treatment all genotypes displayed  
178 100% survival (Fig. S3D). Together these results clearly demonstrate that *OsMADS27* is a  
179 positive regulator of salt tolerance in rice.

180 The  $\text{NO}_3^-$  dependence of NaCl-induced expression of *OsMADS27* prompted us to ask  
181 whether OsMADS27-mediated salt tolerance is nitrate-dependent. Thus we further explored the  
182 salt tolerance of different *OsMADS27* genotypes under different  $\text{NO}_3^-$  concentrations. We grew  
183 seedlings in modified hydroponic culture with different  $\text{NO}_3^-$  concentrations for 10 days, then  
184 supplemented with or without 140 mM NaCl in the hydroponic culture and allowed seedlings to  
185 grow for another week. Under 0 mM NaCl conditions, the seedling survival rate was 100% for



186 all the genotypes under all three concentrations of  $\text{NO}_3^-$  (Fig. 3A and C). Under 140 mM NaCl  
187 conditions, the seedling survival rate of all the three genotypes was similarly less than 20% under  
188 low  $\text{NO}_3^-$  conditions (0.02 mM, LN). However, under normal  $\text{NO}_3^-$  conditions (0.2 mM, NN),  
189 the increased  $\text{NO}_3^-$  alleviated the salt stress as reflected by the seedling survival rate of KO  
190 mutants (20%), WT (42%) and OE lines (55%) compared with those under LN conditions (Fig.  
191 3B and D). Under high  $\text{NO}_3^-$  conditions (2 mM, HN), salt stress was further alleviated as  
192 evidenced by the increased seedling survival rate in KO mutants (30%), WT (70%), and OE lines  
193 (80%). These results demonstrate that the salt tolerance mediated by *OsMADS27* is  $\text{NO}_3^-$ -  
194 dependent.

195 To confirm the above hydroponic culture results, we grew the plants of the three genotypes  
196 in potted vermiculite and fed with nutrient solutions containing different concentrations of  $\text{NO}_3^-$   
197 (1.5 mM LN, 2.5 mM NN, 5 mM HN) with or without 65 mM NaCl as described in Methods  
198 (Fig. S4A). The data of yield-related agronomic traits were collected for statistical analyses. Fig.  
199 S4B shows the grain yield per plant of the three genotypes under three N levels without salt  
200 stress. The OE line exhibited significantly higher yield than WT at all three N levels, while the  
201 KO showed lower yield than WT. The OE line exhibited grain yield increase by 29%, 38%, and  
202 25% relative to the WT under LN, NN, and HN conditions respectively, while the KO displayed  
203 yield decrease by 20%, 22%, and 25%. The yield was positively correlated with N level, tiller  
204 number per plant (Fig. S4C), and panicle number (Fig. S4D). Both tiller and panicle number  
205 displayed similar pattern of genotype and N level effects as grain yield did. Under salt stress, The  
206 OE line exhibited grain yield increase by 66%, 40%, and 28% relative to the WT under LN, NN,  
207 and HN conditions respectively, while the KO displayed yield decrease by 33%, 40%, and 28%  
208 under the same conditions (Fig. S4E). Tiller and panicle number displayed a similar trend as  
209 grain yield did (Fig. S4F and G). These results suggest that *OsMADS27* is a positive regulator of  
210 grain yield and further support that *OsMADS27* positively regulates salt tolerance in a  $\text{NO}_3^-$ -  
211 dependent manner in rice.

212 We also conducted field trials to examine the yield of three *OsMADS27* genotypes in the  
213 field of varying N supply and found that agronomic traits including nitrogen use efficiency  
214 (NUE), actual yield per plot, grain yield per plant, panicles number per plant, number of seeds  
215 per plant, and primary branch number per panicle were significantly improved in OE plants



216 under normal and high N availability, whereas reduced in KO plants compared with the wild  
217 type (Fig. S5). The field trial data further support that *OsMADS27* is a positive regulator of grain  
218 yield, which is positively correlated with  $\text{NO}_3^-$  availability.

### 219 **RNA sequencing reveals *OsMADS27*-regulated genes involved in stress tolerance**

220 To determine the global network of genes regulated by *OsMADS27*, we carried out  
221 transcriptomic analyses of WT, KO, and OE plants subjected to 0 mM or 100 mM NaCl for 3  
222 consecutive days to identify the DEGs (differentially expressed genes). The number of DEGs  
223 was significantly different among WT, KO, and OE under saline and normal conditions,  
224 revealing that *OsMADS27* widely regulates the transcriptome in response to salt stress (Fig. 4A  
225 and B).

226 The in-depth information about DEGs was obtained by KEGG (Kyoto Encyclopedia of  
227 Genes and Genomes) pathway and GO (Gene Ontology) analyses to detect significantly  
228 expressed DEGs in KO vs WT and OE vs WT under control and salt conditions (Fig. 4C and  
229 S6). Remarkably, the genes involved in salt response were highly enriched in DEGs, indicating  
230 that *OsMADS27* may coordinately regulate the key genes in salt tolerance (Fig. 4C). The  
231 heatmap demonstrates that the transcript level of ethylene response factor (*OsWR2*), salinity-  
232 responsive MYB transcription factor (*OsMPS*), A-type response regulator (*OsRR2*), rice cyclin  
233 gene (*OsCycB1;3*), oxidative stress 3 (*OsO3L2*), and a heat shock transcription factor (*OsSPL7*)  
234 was higher in the OE plants under salt stress. In addition to the salt-responsive genes, key genes  
235 involved in ion transport, such as  $\text{K}^+$  transporters (*OsHKT1.1*, *OsHKT2.3*),  $\text{K}^+$  channel  
236 (*OsKAT3*), salt-inducible calmodulin gene (*OsCAM1*), and aluminum-activated transporter of  
237 malate (*OsALMT4*) were significantly down-regulated in KO mutant while up-regulated in the  
238 OE line under salt stress. *OsMADS27* also positively regulates the expression of prominent  
239 ABA-responsive genes such as *OsNCED1*, *OsRAB16*, and *OsGLP1*, which were expressed at  
240 higher levels in OE plants. Moreover, the genes of peroxidases in antioxidation including  
241 *OsPRX29*, *OsPRX27*, *OsPRX74*, *OsGPX*, *OsPRX132* were significantly upregulated in OE vs  
242 WT (salt group). Furthermore, *OsMADS27* positively regulates the expression of N-responsive  
243 genes as the expression level of *OsNRT2.4*, *OsNAR2.1*, *OsNPF5.16*, *OsNPF2.2/OsPTR2* and  
244 *OsNLA1* was predominantly enhanced in WT vs OE group after salt treatment (Fig. 4C). In  
245 addition, GO enrichment analyses show that *OsMADS27* also affected the expression of some

246 genes involved in oxidation-reduction process, regulation of transcription, defense response and  
247 protein phosphorylation under normal conditions (Fig. S6A and B), whereas hydrogen peroxide  
248 catabolic process, flavonoid biosynthesis, abscisic acid catabolism, defense response and  
249 tyrosine catabolism related genes were also regulated by *OsMADS27* under salt stress conditions  
250 (Fig. S6C and D).

251 The expression pattern of the genes involved in salt response and ion transport was verified  
252 by RT-qPCR, which was largely in agreement with the RNA-seq data (Fig. S7). Taken together,  
253 our RNA-seq data suggest that *OsMADS27* confers salt tolerance in rice by regulating salt-  
254 responsive genes, maintaining ion balance, and enhancing ROS scavenging.

### 255 **OsMADS27 transcriptionally activates *OsHKT1.1* and *OsSPL7***

256 To demonstrate the capability of *OsMADS27* to regulate its target genes, we generated the  
257 transgenic rice plants expressing *OsMADS27pro:OsMADS27-GFP* for ChIP (chromatin  
258 immunoprecipitation) assay. The *cis1* region of *OsHKT1.1* promoter and *cis2* and *cis3* regions of  
259 *OsSPL7* promoter were found to be enriched in the transgenic rice plants as demonstrated by  
260 qRT-PCR (Fig. 5A and B). Furthermore, we performed transactivation assays using 35S-  
261 *OsMADS27* as the effector and *OsHKT1.1* and *OsSPL7* promoter-driven LUC (luciferase) as  
262 reporters. When reporter and effector were co-transfected into the tobacco leaves, we observed  
263 that *OsMADS27* activated the expression of LUC genes linked to the promoters of *OsHKT1.1*  
264 and *OsSPL7* (Fig. 5C and D). Taken together, these results demonstrate that *OsMADS27* binds  
265 the *cis* elements in the promoter of *OsHKT1.1* and *OsSPL7* and activates their expression.

### 266 **Nitrate-responsive OsNLP4 upregulates *OsMADS27* and confers its nitrate dependence**

267 To explore the mechanism by which  $\text{NO}_3^-$  specifically induces the expression of *OsMADS27*,  
268 we performed *cis* elements search in the promoter of *OsMADS27* and found that the promoter of  
269 *OsMADS27* harbors multiple nitrate-responsive *cis*-elements (NREs), the binding site for nin-  
270 like protein (NLP) transcription factors (Konishi and Yanagisawa, 2010; Wu et al., 2021).  
271 Further exploration revealed that the expression level of *OsMADS27* was significantly up-  
272 regulated in *OsNLP4* overexpression plants and down-regulated in the knockout mutants (Fig.  
273 6A). Subsequent ChIP assay showed that the *cis1* portion of the *OsMADS27* promoter harboring  
274 NRE was significantly enriched, confirming that *OsNLP4* binds to the *OsMADS27* promoter *in*

275 *in vivo* (Fig. 6B). The binding was further confirmed by electrophoretic mobility shift assay  
276 (EMSA) (Fig. 6C). Furthermore, we conducted a dual-luciferase reporter assay to further verify  
277 the transcription activation of *OsMADS27* by OsNLP4 in tobacco leaves. Strong fluorescent  
278 signals were shown when the effector construct *35S-OsNLP4* was co-transfected with the  
279 reporter construct *OsMADS27pro::LUC* (Fig. 6D), indicating that OsNLP4 transcriptionally  
280 activates the expression of *OsMADS27*.

## 281 **Discussion**

282 In addition to being an essential nutrient,  $\text{NO}_3^-$  acts as a signaling molecule involved in  
283 controlling multiple metabolic processes in plants (Crawford, 1995). Importantly, nitrate is also a  
284 major factor affecting the salt tolerance of crops.  $\text{NO}_3^-$  application can promote the growth and  
285 yield of rice, wheat, canola, citrus, strawberry, pepper, allium, and other plants under salt stress  
286 (Çavuşoğlu et al., 2017; Domingo et al., 2004; Gao et al., 2016; Kaya et al., 2003; Kaya and  
287 Higgs, 2003; Zheng et al., 2008). However, the intrinsic molecular mechanism of  $\text{NO}_3^-$ -mediated  
288 alleviation of salt stress has not been reported so far. In this study, we unraveled the OsNLP4-  
289 OsMADS27 module that is crucial for coupling  $\text{NO}_3^-$  signaling and salt tolerance in rice. We  
290 demonstrated that  $\text{NO}_3^-$  not only induced the expression of *OsMADS27* as described previously  
291 (Chen et al., 2018a; Pachamuthu et al., 2022; Puig et al., 2013; Yu et al., 2014), but also  
292 promoted the nuclear localization of OsMADS27 (Figs. 1 and 2). OsNLP4, a  $\text{NO}_3^-$ -responsive  
293 TF translocating into the nucleus in the presence of  $\text{NO}_3^-$  (Wu et al., 2021), transcriptionally  
294 activates the expression of *OsMADS27* (Fig. 6). Then OsMADS27 activates an array of stress  
295 tolerance-related genes as revealed by RNA-seq analyses (Fig. 4) by directly binding to their  
296 promoters as demonstrated for *OsHKT1.1* and *OsSPL7* (Fig. 5), thereby enhancing growth and  
297 grain yield under salt stress in rice (Figs. 3 and S4). However, in the absence of  $\text{NO}_3^-$ , OsNLP4  
298 was mainly localized in the cytoplasm, resulting in very low expression of *OsMADS27*, which  
299 was insufficient to confer salt tolerance in rice as illustrated in the working model (Fig. 8). Our  
300 study revealed a novel mechanism of  $\text{NO}_3^-$ -dependent salt tolerance-mediated by *OsMADS27*,  
301 which may be exploited for the improvement of salt tolerance and grain yield in rice.

## 302 **Mechanisms of *OsMADS27*-conferred salt tolerance**

303 TFs regulate the expression of various stress-related genes by binding with regulatory motifs  
304 in the promoters of these genes in response to stresses (Yamaguchi-Shinozaki and Shinozaki,  
305 2006). Likely benefiting from the simultaneously coordinating the expression of salt-responsive  
306 genes (Fig. 4), MADS-box TF *OsMADS27* overexpression increased the transcriptional levels of  
307 regulators such as ethylene response factor *OsWR2* (Zhou et al., 2013), salt stress response MYB  
308 transcription factor *OsMPS* (Schmidt et al., 2013), A-type response regulator *OsRR2* (Ito and  
309 Kurata, 2006), and rice cyclin gene *OsCycB1;3* (La et al., 2006), resulting in significantly  
310 improved salt tolerance in germination, seedlings, and reproductive phase of rice (Figs. 3, S3 and  
311 S4).

312 Salt tolerance is highly dependent on intracellular ion homeostasis in order to maintain the  
313 turgidity of cell and membrane potential (Bargmann et al., 2009). In our transcriptomic data, the  
314 expression of K<sup>+</sup> transporters such as *OsHKT1.1* (Imran et al., 2020), *OsHKT2.3* (Zhang et al.,  
315 2018), K<sup>+</sup> channel *OsKAT3* (Hwang et al., 2013), and Ca<sup>2+</sup> sensor *OsCAM1.1* that positively  
316 regulates salt tolerance in rice (Saeng-ngam et al., 2012) was significantly enhanced in the OE  
317 plants compared with WT under salt stress (Fig. 4C). We found that OsMADS27 directly binds  
318 and transcriptionally activates *OsHKT1.1*, which encodes a membrane-localized high-affinity K<sup>+</sup>  
319 transporter (Fig. 5). The *oshkt1.1* knockout mutant rice plants are salt-sensitive depicting its  
320 function in the Na<sup>+</sup> retrieval from leaf blades (Wang et al., 2015). These results demonstrate that  
321 *OsMADS27* positively regulates salt tolerance in rice via maintaining ion homeostasis.

322 In addition, salinity leads to the accumulation of reactive oxygen species (ROS) in plants  
323 (Luo et al., 2021), the increased production of which leads to oxidative burden hence being a  
324 havoc to cellular membranes as well as macromolecules (Lin et al., 2020). As a target gene of  
325 OsMADS27 (Fig. 5), the heat shock transcription factor *OsSPL7* plays an important role in  
326 maintaining ROS homeostasis in rice. The *spl7* mutant lost regulation of nicotinamide adenine  
327 dinucleotide oxidase, resulting in the accumulation of more H<sub>2</sub>O<sub>2</sub> in the cells (Hoang et al.,  
328 2019). Consistently, our *OsMADS27* overexpression plants exhibited improved resistance against  
329 oxidative burden as depicted by our RNA-seq results (Fig. 4C). The upregulation of a number of  
330 peroxidases (*OsPRX29*, *OsPRX27*, *OsPRX74*, *OsGPX*, and *OsPRX132*) in OE plants  
331 demonstrated that the overexpression of *OsMADS27* ameliorated salt-generated oxidative stress.

332 ABA, as a stress hormone, plays an important role in the response of plants to salt (Duan et  
333 al., 2013; Suzuki et al., 2016b). The enrichment of genes involved in ABA synthesis such as  
334 *OsAAO2* and *OsNCED1* (Huang et al., 2021) and ABA-responsive genes such as *OsABI5* and  
335 *OsRABI6* (Jiang et al., 2019; Zou et al., 2008) in the OE vs WT group under salt stress (Fig. 4C)  
336 implied the possibility that *OsMADS27* may also be involved in ABA signaling. *OsMADS27* has  
337 been reported to control  $\text{NO}_3^-$ -dependent root growth via ABA pathway (Chen et al., 2018a). The  
338 possible crosstalk between *OsMADS27*, ABA signaling, and salt stress tolerance needs future  
339 attention. Taken together, the salt tolerance mediated by *OsMADS27* in rice is mainly by  
340 regulating stress-responsive regulators, balancing ion homeostasis, enhancing ROS scavenging  
341 ability, and involving in ABA signaling pathway.

#### 342 **OsNLP4-OsMADS27 module controls the nitrate dependence of *OsMADS27*-mediated salt** 343 **tolerance**

344 It is known that multiple members of the MADS-box TF family are involved in the  
345 regulation of  $\text{NO}_3^-$  responses. *Arabidopsis* nitrate regulated1 (*AtANR1*) is the first  $\text{NO}_3^-$   
346 regulator found to be involved in the regulation of lateral root developmental plasticity in  
347 response to  $\text{NO}_3^-$  (Zhang and Forde, 1998). *ANR1*-like gene *OsMADS25* is a positive regulator  
348 controlling the development of primary and lateral roots of rice by affecting  $\text{NO}_3^-$  accumulation  
349 (Yu et al., 2015). *OsMADS27* is preferentially expressed in roots, and  $\text{NO}_3^-$  could significantly  
350 induce its expression (Yu et al., 2014). We also found that *OsMADS27* specifically responded to  
351  $\text{NO}_3^-$  rather than ammonium (Fig. 1A, B and 2). The specific  $\text{NO}_3^-$  responsiveness of *OsMADS27*  
352 suggests that a likely  $\text{NO}_3^-$ -responding upstream regulator modulates *OsMADS27*. Indeed, we  
353 found that the early  $\text{NO}_3^-$  response TF OsNLP4 directly binds to the *OsMADS27* promoter and  
354 upregulates its expression (Fig. 6). OsNLP4 is a key TF for  $\text{NO}_3^-$  signaling through nuclear  
355 retention mechanisms. Under  $\text{NO}_3^-$  starvation, OsNLP4 proteins are almost exclusively localized  
356 in the cytosol (Wu et al., 2021), hence unable to activate the transcription of *OsMADS27*.  
357 However, after  $\text{NO}_3^-$  was resupplied, OsNLP4 proteins were quickly and predominantly  
358 accumulated in the nucleus, resulting in a strong activation of *OsMADS27* (Fig. 1A, B and 6).  
359 This OsNLP4-OsMADS27 regulatory module promptly controls *OsMADS27*-mediated salt  
360 tolerance in a  $\text{NO}_3^-$ -dependent manner. Recently, it was reported that  $\text{NO}_3^-$  restriction increased  
361 the abundance of miR444, thereby inhibiting the expression of *OsMADS27* and thus regulating

362 rice root development (Pachamuthu et al., 2022). These results indicate that there are multiple  
363 ways for  $\text{NO}_3^-$  signaling to regulate *OsMADS27* expression.

### 364 ***OsMADS27* is a positive regulator of grain yield**

365 N uptake and assimilation is closely related to crop yield (Chen et al., 2020; Daniel-Vedele  
366 et al., 1998; Hu et al., 2015; Makino, 2011). In addition to controlling salt tolerance in rice,  
367 *OsMADS27* may also positively regulate grain yield by modulating N metabolism and  
368 utilization. In our transcriptomic data, a number of  $\text{NO}_3^-$  transporters were upregulated in OE  
369 compared to WT under salt stress conditions, such as dual affinity  $\text{NO}_3^-$  transporter *OsNRT2.4*  
370 (Wei et al., 2018), *OsNAR2.1* required by some members of NRT2 family for  $\text{NO}_3^-$  transport  
371 (Chen et al., 2020), *OsNP5.16*, a positive regulator of grain yield and tiller number (Wang et al.,  
372 2021), and low-affinity  $\text{NO}_3^-$  transporter *OsPTR2* (Li et al., 2015) (Fig. 4C). The significant  
373 upregulation of these N transporters and helper protein *OsNAR2.1* correlates with improved yield  
374 in transgenic plants under variable N conditions (Fig. S5), suggesting that *OsMADS27* is a  
375 positive regulator of rice grain yield.

376 In conclusion, *OsNLP4-OsMADS27* module positively regulates the salt tolerance in rice in  
377 a  $\text{NO}_3^-$ -dependent manner by controlling salt-responsive genes, balancing ion homeostasis, and  
378 enhancing ROS scavenging. *OsMADS27* is also an important determinant of yield in rice by  
379 modulating the expression of N uptake and assimilation-related genes. Hence, our study fills the  
380 gap in the molecular mechanism of  $\text{NO}_3^-$ -dependent salt tolerance and provides a promising  
381 candidate for the development of salt-tolerant crops.

## 382 **Methods**

### 383 **Plant material and culture conditions**

384 The loss-of-function mutants KO1 and KO2 with ZH11 background were generated by  
385 Hangzhou Biogle Co., Ltd (Hangzhou, China) (<http://www.biogle.cn/>), using CRISPR-CAS9  
386 technology, according to the protocol previously described (Lu et al., 2017). The mutants were  
387 selected on the bases of their corresponding resistance to hygromycin B. The  
388 *ACTINI:OsMADS27* overexpression construct was made by inserting the coding region of  
389 *OsMADS27* into pCB2006 via GATEWAY cloning system (Lei et al., 2007). The binary vector  
390 was transferred into *Agrobacterium tumefaciens* (EHA105) for rice transformation. Homozygous



391 lines (T<sub>3</sub> generation) were selected using glufosinate and expression was confirmed by RT-PCR  
392 and quantitative RT-PCR. These homozygous lines were propagated for obtaining T<sub>4</sub> generation  
393 which was used for further experimental analyses.

394 A modified Kimura B solution was used for hydroponic culture of rice seedlings in the  
395 growth chamber with controlled climate as described (Wu et al., 2021). Growth conditions were  
396 maintained at 28°C temperature, photo-regime of 16 hours light /8 hours dark, 70% relative  
397 humidity, and light intensity at 250 mmol m<sup>-2</sup> s<sup>-1</sup>.

### 398 **Salt tolerance assays**

399 **Seed germination.** Seeds of wild type, KO1 and KO2 mutants, OE7, and OE8 were washed  
400 with distilled water and incubated at 37°C for 7 days. To analyze seed germination, 60~80 seeds  
401 (three replicates per genotype) were randomly placed in a petri dishes containing either water or  
402 water plus 150 mM NaCl. The seeds were considered to have germinated when their radicle or  
403 germ length reached approximately 1 mm. Seed germination was observed daily to calculate the  
404 germination percentage.

405 **Seedlings in hydroponic culture.** Seeds of wild type, KO1, KO2, OE7, and OE8 were  
406 washed with distilled water and incubated at 37°C for 3 days. Germinated seeds were transferred  
407 to Hoagland solutions (pH6.0) with different N concentrations (0.02 mM, 0.2 mM, 2 mM KNO<sub>3</sub>)  
408 to grow for 7 days, followed by addition of 140 mM NaCl to the culture medium and treated for  
409 7 days. The provided growth conditions were kept at 14-h-light/10-h-dark cycle at 28°C.

410 **Seedlings in soil.** For the salt treatment in soil, 30 seedlings from each of the wild type,  
411 KO1, KO2, OE7, and OE8 were directly grown on soil pot (the pot dimensions were 5×5×12  
412 cm<sup>3</sup>, and five plants were grown per pot). After grown for 4 weeks in soil under greenhouse  
413 conditions of 16 h light/ 8 h dark at 30°C, plants were either irrigated with 0 mM or 150 mM  
414 NaCl solution for 6-8 days before seedling survival rate was counted.

415 **Long-term salt treatment** Seeds of WT, KO1, and OE7 were germinated in plates for 4  
416 days and then transferred to similar pots as previously used for salt treatment of 4-week-old  
417 seedlings. The plants were grown in the pots filled with vermiculite and fed with different N  
418 concentrations (1.5 mM, 2.5 mM, 5 mM KNO<sub>3</sub>) for 3 weeks, then followed by 65 mM NaCl as  
419 salt treatment or without NaCl as control for about 10-12 weeks. Every treatment contains 8 trays



420 with two pots for each genotype and every pot has a single plant. The plants were grown to  
421 mature under the greenhouse conditions and yield data were collected.

#### 422 **RNA extraction and quantitative real-time PCR (qRT-PCR)**

423 Total cellular RNA was extracted from rice tissues (0.08-0.1 g) via Trizol method  
424 (Invitrogen, Carlsbad, USA), 1 µg of which was used for cDNA synthesis. The synthesized  
425 cDNA was used for qRT-PCR using TaKaRa SYBR Pre-mix Ex-TaqII kit reagents. The primers  
426 used are listed in the Table S1. At least three biological replicates were used for each experiment.

#### 427 **GUS analyses**

428 A 2.0-kb promoter region of *OsMADS27* was amplified from rice genomic DNA (ZH11)  
429 followed by its cloning in pCB308R (Lei et al., 2007; Xiang et al., 1999), then recombinant  
430 *OsMADS27promotor:GUS* vector was transformed into ZH11 to generate the *OsMADS27:GUS*  
431 transgenic plants. For the purpose of GUS staining, the seedlings of *OsMADS27pro:GUS*  
432 transgenic plants were incubated in staining solution for 3 hours at 37°C and dehydrated in a  
433 series of ethanol (70, 80, 90, and 100%). The dyed tissues were monitored under HiROX  
434 MX5040RZ digital optical microscope (Qeuster China Limited) and then photographed by  
435 Nikon D700 digital camera.

#### 436 **Subcellular localization analyses**

437 The fusion vector *OsMADS27pro:OsMADS27-GFP* were created by cloning 2.0-kb  
438 promoter and the full length coding sequence of OsMADS27 in the binary vector pUC19. The  
439 gene insertion was confirmed by nucleotide sequencing and the ultimate vector was transformed  
440 into *Agrobacterium tumefaciens* (EH105). The rice callus was transformed by *Agrobacterium*-  
441 based transformation and the selection of positive seedlings was performed by culturing them in  
442 hygromycin B containing medium. To investigate the nuclear-cytoplasmic shuttling of  
443 OsMADS27, the positive seedlings were grown on the modified Kimura B solution with 2 mM  
444 KNO<sub>3</sub> or without N for 10 days. Subsequently, N-free medium treated with either 2 mM KNO<sub>3</sub>  
445 or 2 mM NH<sub>4</sub>Cl or 150 mM NaCl for 60 min, and returned to the N-free medium. Additionally,  
446 2 mM KNO<sub>3</sub> medium treated with 150 mM NaCl for 60 min, and returned to N-free medium.  
447 The confocal microscopy was performed by Zeiss 710 microscope having argon laser (488 nm  
448 for GFP excitation).

## 449 **Western blot analysis**

450 Proteins were extracted from the 2-week-old seedlings grown hydroponically on medium  
451 containing different N concentrations 0.02 mM, 0.2 mM and 2 mM KNO<sub>3</sub> without salt as control  
452 or with 100 mM NaCl using the RIPA lysis buffer (strong) (Beyotime, China). For western blot  
453 analysis, proteins were electroblotted from 10% acrylamide gel to nitrocellulose membrane  
454 (Immobilon-P, MILLIPORE Corporation, Bedford, MA, USA) after the separation of SDS-  
455 PAGE. Antibodies used in western blot were as follows: anti-GFP antibody (M20004, Mouse  
456 mAb, Abmart, Shanghai, China), 1:1000 for western blot; anti-ACTIN antibody (M20009,  
457 Mouse mAb, Abmart, Shanghai, China), 1:1000 for western blot and goat anti-mouse IgG-HRP  
458 (M21001, Abmart, Shanghai, China), 1:5000 for western blot. Image Quant LAS 4000 (GE,  
459 USA), as the CCD camera system, was used for the band intensity quantification with Super  
460 Signal West Femto Trial Kit (Thermo, Rockford, IL, USA).

## 461 **Electrophoretic mobility shift assay (EMSA)**

462 Electrophoretic mobility shift assay (EMSA) was conducted as previously described  
463 (Hellman and Fried, 2007). The coding sequence of *OsNLP4* was cloned into pMAL c2x vector  
464 and MBP-NLP4 fusion protein was expressed in *E. coli* Rosseta2 strain. Biotin-labelled DNA  
465 that 45 bp fragment containing CARG motif and unlabelled competitor DNA were synthesized by  
466 Sangon Biotech Co., Ltd (Shang Hai, China). DNA probes were generated by cooling down the  
467 mixtures of complementary oligonucleotides from 95°C to room temperature. EMSA assay was  
468 performed using a LightShift™ EMSA Optimization and Control Kit (20148×) (Thermo Fisher  
469 Scientific, Waltham, USA). The reaction mixtures were loaded on 6% polyacrylamide gel in 0.5  
470 × TBE buffer and electrophoresed at 4°C. These results were detected by a CCD camera system  
471 (Image Quant LAS 4000).

## 472 **Transient transactivation assays in tobacco leaf**

473 Transient transactivation assay in tobacco leaf was performed as previously described (Lim  
474 et al., 2017). The coding sequences of *OsMADS27/OsNLP4* were constructed into pRI101 vector  
475 as reporters. About 2500 bp promoters of *OsHKT1.1*, *OsSPL7*, *OsMADS27* were respectively  
476 cloned into pGreenII 0800 vector as reporters. These constructs were electroporated into  
477 *Agrobacterium* GV3101 strain, then cultured in LB medium at 28°C for 2 days. The precipitate

478 was collected by centrifugation at 5000 rpm for 5 min, resuspended with infiltration buffer (10  
479 mM MES, 10 mM MgCl<sub>2</sub>, 150 mM acetosyringone, pH 5.6), and incubated at room temperature  
480 for 2 hours before co-injecting into *Nicotiana benthamiana* leaves. 3 days after injection, tobacco  
481 leaves were sprayed using LUC substrates (1 mM Xeno light™ D-luciferin potassium salt). At  
482 least three biological replicates were used for each experiment.

### 483 **RNA-sequencing analysis**

484 Each genotype has about 100 seedlings (ZH11 background) of every treatment was grown  
485 hydroponically in a growth chamber with the condition described above. The seedlings were  
486 cultured in modified Kimura B solution with 1.5 mM KNO<sub>3</sub> for 12 days and treated with 100  
487 mM NaCl or without NaCl as a control for another three days. 15-day-old seedlings (whole  
488 plants) were sampled for RNA-sequencing. For each treatment, 20 seedlings were collected as a  
489 sample, and three independent biological replicates were conducted. RNA library construction  
490 and sequence analysis were conducted as described previously (Khan et al., 2016a).

### 491 **Yeast one-hybrid assay**

492 The protein putative binding sites were cloned into BD vector (pHIS2), and the coding  
493 sequences of *OsMADS27/OsNLP4* were cloned into AD vector (pAD-GAL4-2.1), respectively.  
494 A yeast one-hybrid (Y1H) assay was conducted according to the procedure described previously  
495 (Mao et al., 2016).

### 496 **Chromatin immunoprecipitation–quantitative PCR assay**

497 A chromatin immunoprecipitation (ChIP) assay was carried out according to the protocol  
498 described before (O'Geen et al., 2010) with minor modifications. Transgenic rice  
499 (*OsMADS27pro:OsMADS27-GFP*) seedlings were grown under high nitrogen (2 mM) condition  
500 for 2 weeks. About 2.0 g of seedlings were placed in 1% formaldehyde (v/v) at 20-25 °C in  
501 vacuum for 15 min and then homogenized within liquid nitrogen. Chromatin from lysed nuclei  
502 was fragmented ultrasonically to achieve an average length of 500 bp. The anti-GFP antibodies  
503 (Sigma, F1804) were immunoprecipitated overnight at 4 °C. The immuno-precipitated DNA  
504 fragments were dissolved in water and kept at –80 °C before use. The precipitated fragments  
505 were used as template for quantitative PCR (qPCR).

## 506 **Field trial of rice**

507 For the field test of KO1 mutant and *OsMADS27*-overexpressing (OE7) (all with ZH11  
508 background), T3 generation plants were grown in Chang Xing, Zhejiang in 2021 (April to  
509 September). The plant density was 6 rows, 20 plants per row for each plot, and four replicates  
510 were used for each N condition. Urea was used as the N fertilizer at 94 kg N hm<sup>-2</sup> for low N  
511 (LN), 184 kg N hm<sup>-2</sup> for normal N (NN), and 375 kg N hm<sup>-2</sup> for high N (HN). To reduce the  
512 variability in the field test, the fertilizers were used evenly in each plot for N application level.  
513 The plants at the edge were excluded from data collection in each plot in order to avoid margin  
514 effects.

## 515 **Agronomic trait analyses**

516 Individual tiller number, panicle number, and grain yield per plant were measured according  
517 to a protocol documented earlier (Hu et al., 2015).

## 518 **Accession numbers**

519 Sequence data from this article can be found in the Rice Genome Annotation Project  
520 (<https://rice.plantbiology.msu.edu/>) under the following accession numbers: *OsMADS27*,  
521 *LOC\_Os02g36924*; *OsHKT1.1*, *LOC\_Os04g51820*; *OsNLP4*, *LOC\_Os09g37710*; *OsSPL7*,  
522 *LOC\_Os05g45410*; *OsHKT2.3*, *LOC\_Os01g34850*; *OsKAT3*, *LOC\_Os02g14840*; *OsO3L2*,  
523 *LOC\_Os06g36390*; *OsMPS*, *LOC\_Os02g40530*.

## 524 **Supplemental Data**

525 Fig. S1. Expression pattern of *OsMADS27*.

526 Fig. S2. Verification of the CRISPR/Cas9-edited mutations in *OsMADS27* and  
527 overexpression lines of *OsMADS27*.

528 Fig. S3. *OsMADS27* positively affects salt tolerance in germination and seedling growth.

529 Fig. S4. *OsMADS7* positively affects grain yield in a N-dependent manner under normal  
530 and salt stress conditions.

531 Fig. S5. *OsMADS27* improves NUE and grain yield in the field of different nitrogen  
532 concentrations.

533 Fig. S6. The gene ontology (GO)-based enrichment analysis of DEGs.

534 Fig. S7. *OsMADS27* broadly regulates the genes involved in salt tolerance.

535 Table S1. List of primers used in this study.

## 536 **Funding**

537 The Strategic Priority Research Program of the Chinese Academy of Sciences (grant no.  
538 XDA24010303 to C.B.X.).

## 539 **Author Contributions**

540 C.B.X., A.A., P.X.Z., and J.W. designed the experiments. A.A., T.N., J.Z., J.W., Y.S.,  
541 P.X.Z. and S.U.J. performed experiments and data analyses. J.W., Z.S.Z., J.Q.X. and Z.Y.Z.  
542 performed field trials and data analyses. A.A. and J.W. wrote the manuscript. C.B.X., P.X.Z. and  
543 J.W. revised the manuscript. C.B.X. supervised the project.

## 544 **Acknowledgements**

545 This work was supported by the Strategic Priority Research Program of the Chinese  
546 Academy of Sciences (grant no. XDA24010303). Alamin Alfatih was a recipient of CAS-TWAS  
547 President's Fellowship and CAS International Postdoctoral Fellowship. Sami Ullah Jan was a  
548 recipient of CAS-TWAS President's Fellowship. The authors declare no conflicts of interest.

549

## 550 **References:**

- 551 Adem, G.D., Roy, S.J., Zhou, M., Bowman, J.P. and Shabala, S. (2014) Evaluating contribution of ionic,  
552 osmotic and oxidative stress components towards salinity tolerance in barley. *BMC plant biology*  
553 **14**, 113.  
554 Ahammed, G.J., Li, X., Yang, Y., Liu, C., Zhou, G., Wan, H. and Cheng, Y. (2020) Tomato WRKY81 acts as a  
555 negative regulator for drought tolerance by modulating guard cell H<sub>2</sub>O<sub>2</sub>-mediated stomatal  
556 closure. *Environmental and Experimental Botany* **171**, 103960.

- 557 Aragao, R.M., Silva, E.N., Vieira, C.F. and Silveira, J.A. (2012) High supply of NO<sub>3</sub><sup>-</sup> mitigates salinity  
558 effects through an enhancement in the efficiency of photosystem II and CO<sub>2</sub> assimilation in  
559 *Jatropha curcas* plants. *Acta Physiologiae Plantarum* **34**, 2135-2143.
- 560 Asano, T., Hayashi, N., Kobayashi, M., Aoki, N., Miyao, A., Mitsuhara, I., Ichikawa, H., Komatsu, S.,  
561 Hirochika, H., Kikuchi, S. and Ohsugi, R. (2012) A rice calcium-dependent protein kinase OsCPK12  
562 oppositely modulates salt-stress tolerance and blast disease resistance. *Plant Journal* **69**, 26-36.
- 563 Ashraf, M., Athar, H., Harris, P. and Kwon, T. (2008) Some prospective strategies for improving crop salt  
564 tolerance. *Advances in agronomy* **97**, 45-110.
- 565 Bargmann, B.O., Laxalt, A.M., Riet, B.t., Van Schooten, B., Merquiol, E., Testerink, C., Haring, M.A.,  
566 Bartels, D. and Munnik, T. (2009) Multiple PLDs required for high salinity and water deficit  
567 tolerance in plants. *Plant and Cell Physiology* **50**, 78-89.
- 568 Bose, J., Rodrigo-Moreno, A. and Shabala, S. (2014) ROS homeostasis in halophytes in the context of  
569 salinity stress tolerance. *Journal of experimental botany* **65**, 1241-1257.
- 570 Campo, S., Baldrich, P., Messeguer, J., Lalanne, E., Coca, M. and San Segundo, B. (2014) Overexpression  
571 of a Calcium-Dependent Protein Kinase Confers Salt and Drought Tolerance in Rice by  
572 Preventing Membrane Lipid Peroxidation. *Plant Physiology* **165**, 688-704.
- 573 Cao, M.J., Wang, Z., Zhao, Q., Mao, J.L., Speiser, A., Wirtz, M., Hell, R., Zhu, J.K. and Xiang, C.B. (2014)  
574 Sulfate availability affects ABA levels and germination response to ABA and salt stress in  
575 *Arabidopsis thaliana*. *Plant Journal* **77**, 604-615.
- 576 Çavuşoğlu, K., Cadil, S. and Çavuşoğlu, D. (2017) Role of Potassium Nitrate (KNO<sub>3</sub>) in Alleviation of  
577 Detrimental Effects of Salt Stress on Some Physiological and Cytogenetical Parameters in *Allium*  
578 *cepa* L. *Cytologia* **82**, 279-286.
- 579 Chakraborty, K., Bose, J., Shabala, L. and Shabala, S. (2016) Difference in root K<sup>+</sup> retention ability and  
580 reduced sensitivity of K<sup>+</sup>-permeable channels to reactive oxygen species confer differential salt  
581 tolerance in three Brassica species. *Journal of Experimental Botany* **67**, 4611-4625.
- 582 Chen, C., Begcy, K., Liu, K., Folsom, J.J., Wang, Z., Zhang, C. and Walia, H. (2016) Heat stress yields a  
583 unique MADS box transcription factor in determining seed size and thermal sensitivity. *Plant*  
584 *physiology* **171**, 606-622.
- 585 Chen, G., Hu, Q., Luo, L., Yang, T., Zhang, S., Hu, Y., Yu, L. and Xu, G. (2015) Rice potassium transporter  
586 OsHAK1 is essential for maintaining potassium-mediated growth and functions in salt tolerance  
587 over low and high potassium concentration ranges. *Plant Cell and Environment* **38**, 2747-2765.
- 588 Chen, H., Xu, N., Wu, Q., Yu, B., Chu, Y., Li, X., Huang, J. and Jin, L. (2018a) OsMADS27 regulates the root  
589 development in a NO<sub>3</sub><sup>-</sup>-Dependent manner and modulates the salt tolerance in rice (*Oryza*  
590 *sativa* L.). *Plant Science* **277**, 20-32.
- 591 Chen, J., Liu, X., Liu, S., Fan, X., Zhao, L., Song, M., Fan, X. and Xu, G. (2020) Co-overexpression of  
592 OsNAR2. 1 and OsNRT2. 3a increased agronomic nitrogen use efficiency in transgenic rice plants.  
593 *Frontiers in Plant Science* **11**, 1245.
- 594 Chen, L., Zhao, Y., Xu, S., Zhang, Z., Xu, Y., Zhang, J. and Chong, K. (2018b) Os MADS 57 together with Os  
595 TB 1 coordinates transcription of its target Os WRKY 94 and D14 to switch its organogenesis to  
596 defense for cold adaptation in rice. *New Phytologist* **218**, 219-231.
- 597 Chen, Z., Zhao, P.X., Miao, Z.Q., Qi, G.F., Wang, Z., Yuan, Y., Ahmad, N., Cao, M.J., Hell, R., Wirtz, M. and  
598 Xiang, C.B. (2019) SULTR3s Function in Chloroplast Sulfate Uptake and Affect ABA Biosynthesis  
599 and the Stress Response. *Plant Physiology* **180**, 593-604.
- 600 Clarkson, D.T. and Hanson, J.B. (1980) The mineral nutrition of higher plants. *Annual Review of Plant*  
601 *Biology* **31**, 239-298.
- 602 Crawford, N.M. (1995) Nitrate: Nutrient and Signal for Plant Growth. *Plant Cell* **7**, 859-868.
- 603 Daniel-Vedele, F., Filleur, S. and Caboche, M. (1998) Nitrate transport: a key step in nitrate assimilation.  
604 *Current Opinion in Plant Biology* **1**, 235-239.

- 605 Domingo, J.I., Yoseph, L., Aurelio, G.C., Francisco, R.T., Eduardo, P.M. and Manuel, T. (2004) Nitrate  
606 improves growth in salt-stressed citrus seedlings through effects on photosynthetic activity and  
607 chloride accumulation. *Tree Physiology* **24**, 1027-1034.
- 608 Duan, L., Dietrich, D., Ng, C.H., Chan, P.M., Bhalerao, R., Bennett, M.J. and Dinneny, J.R. (2013)  
609 Endodermal ABA signaling promotes lateral root quiescence during salt stress in Arabidopsis  
610 seedlings. *Plant Cell* **25**, 324-341.
- 611 Fatma, M., Asgher, M., Masood, A. and Khan, N.A. (2014) Excess sulfur supplementation improves  
612 photosynthesis and growth in mustard under salt stress through increased production of  
613 glutathione. *Environmental and Experimental Botany* **107**, 55-63.
- 614 Fatma, M., Iqbal, N., Gautam, H., Sehar, Z., Sofo, A., D'Ippolito, I. and Khan, N.A. (2021) Ethylene and  
615 Sulfur Coordinately Modulate the Antioxidant System and ABA Accumulation in Mustard Plants  
616 under Salt Stress. *Plants* **10**, 180.
- 617 Gao, L., Liu, M., Wang, M., Shen, Q. and Guo, S. (2016) Enhanced Salt Tolerance under Nitrate Nutrition  
618 is Associated with Apoplast Na<sup>+</sup> Content in Canola (*Brassica napus* L.) and Rice (*Oryza sativa* L.)  
619 Plants. *Plant Cell Physiology* **57**, 2323-2333.
- 620 Guo, J., Zhou, Q., Li, X., Yu, B. and Luo, Q. (2017) Enhancing NO<sub>3</sub>-supply confers NaCl tolerance by  
621 adjusting Cl-uptake and transport in *G. max* & *G. soja*. *Journal of soil science and plant nutrition*  
622 **17**, 194-202.
- 623 Hamamoto, S., Horie, T., Hauser, F., Deinlein, U., Schroeder, J.I. and Uozumi, N. (2015) HKT transporters  
624 mediate salt stress resistance in plants: from structure and function to the field. *Current opinion*  
625 *in biotechnology* **32**, 113-120.
- 626 Hellman, L.M. and Fried, M.G. (2007) Electrophoretic mobility shift assay (EMSA) for detecting protein-  
627 nucleic acid interactions. *Nat Protoc* **2**, 1849-1861.
- 628 Hoang, T.V., Vo, K.T.X., Rahman, M.M., Choi, S.-H. and Jeon, J.-S. (2019) Heat stress transcription factor  
629 OsSPL7 plays a critical role in reactive oxygen species balance and stress responses in rice. *Plant*  
630 *Science* **289**, 110273.
- 631 Hu, B., Wang, W., Ou, S., Tang, J., Li, H., Che, R., Zhang, Z., Chai, X., Wang, H. and Wang, Y. (2015)  
632 Variation in NRT1. 1B contributes to nitrate-use divergence between rice subspecies. *Nature*  
633 *Genetics* **47**, 834-838.
- 634 Huang, S., Liang, Z., Chen, S., Sun, H., Fan, X., Wang, C., Xu, G. and Zhang, Y. (2019) A transcription factor,  
635 OsMADS57, regulates long-distance nitrate transport and root elongation. *Plant Physiology* **180**,  
636 882-895.
- 637 Huang, Y.t., Wu, W., Zhao, T.y., Lu, M., Wu, H.p. and Cao, D.d. (2021) Drying temperature regulates vigor  
638 of high moisture rice seeds via involvement in phytohormone, ROS, and relevant gene  
639 expression. *Journal of the Science of Food and Agriculture* **101**, 2143-2155.
- 640 Hwang, H., Yoon, J., Kim, H.Y., Min, M.K., Kim, J.-A., Choi, E.-H., Lan, W., Bae, Y.-M., Luan, S. and Cho, H.  
641 (2013) Unique features of two potassium channels, OsKAT2 and OsKAT3, expressed in rice guard  
642 cells. *PLoS One* **8**, e72541.
- 643 Imran, S., Horie, T. and Katsuhara, M. (2020) Expression and ion transport activity of rice OsHKT1; 1  
644 variants. *Plants* **9**, 16.
- 645 Iqbal, N., Umar, S. and Khan, N.A. (2015) Nitrogen availability regulates proline and ethylene production  
646 and alleviates salinity stress in mustard (*Brassica juncea*). *Journal of Plant Physiology* **178**, 84-91.
- 647 Ito, Y. and Kurata, N. (2006) Identification and characterization of cytokinin-signalling gene families in  
648 rice. *Gene* **382**, 57-65.
- 649 Jiang, D., Zhou, L., Chen, W., Ye, N., Xia, J. and Zhuang, C. (2019) Overexpression of a microRNA-targeted  
650 NAC transcription factor improves drought and salt tolerance in Rice via ABA-mediated  
651 pathways. *Rice* **12**, 1-11.



- 652 Kaya, C., Ak, B.E. and Higgs, D. (2003) Response of Salt-Stressed Strawberry Plants to Supplementary  
653 Calcium Nitrate and/or Potassium Nitrate. *Journal of Plant Nutrition* **26**, 543-560.
- 654 Kaya, C. and Higgs, D. (2003) Supplementary Potassium Nitrate Improves Salt Tolerance in Bell Pepper  
655 Plants. *Journal of Plant Nutrition* **26**, 1367-1382.
- 656 Kaya, C., Tuna, A.L., Ashraf, M. and Altunlu, H. (2007) Improved salt tolerance of melon (*Cucumis melo*  
657 L.) by the addition of proline and potassium nitrate. *Environmental and Experimental Botany* **60**,  
658 397-403.
- 659 Khan, A.U.H., Rathore, M.G., Allende-Vega, N., Vo, D.-N., Belkhala, S., Orecchioni, S., Talarico, G.,  
660 Bertolini, F., Cartron, G. and Lecellier, C.-H. (2016a) Human leukemic cells performing oxidative  
661 phosphorylation (OXPHOS) generate an antioxidant response independently of reactive oxygen  
662 species (ROS) production. *EBioMedicine* **3**, 43-53.
- 663 Khan, H., Ashraf, M., Shahzad, S., Aziz, A., Piracha, M. and Siddiqui, A. (2016b) Adequate regulation of  
664 plant nutrients for improving cotton adaptability to salinity stress. *J Appl Agric Biotechnol* **1**, 47-  
665 56.
- 666 Khong, G.N., Pati, P.K., Richaud, F., Parizot, B., Bidzinski, P., Mai, C.D., Bès, M., Bourrié, I., Meynard, D.  
667 and Beeckman, T. (2015) OsMADS26 negatively regulates resistance to pathogens and drought  
668 tolerance in rice. *Plant Physiology* **169**, 2935-2949.
- 669 Konishi, M. and Yanagisawa, S. (2010) Identification of a nitrate-responsive cis-element in the  
670 Arabidopsis NIR1 promoter defines the presence of multiple cis-regulatory elements for  
671 nitrogen response. *Plant Journal* **63**, 269-282.
- 672 Kumar, K., Kumar, M., Kim, S.-R., Ryu, H. and Cho, Y.-G. (2013) Insights into genomics of salt stress  
673 response in rice. *Rice* **6**, 1-15.
- 674 La, H., Li, J., Ji, Z., Cheng, Y., Li, X., Jiang, S., Venkatesh, P.N. and Ramachandran, S. (2006) Genome-wide  
675 analysis of cyclin family in rice (*Oryza Sativa* L.). *Molecular Genetics and Genomics* **275**, 374-386.
- 676 Lei, Z.Y., Zhao, P., Cao, M.J., Cui, R., Chen, X., Xiong, L.Z., Zhang, Q.F., Oliver, D.J. and Xiang, C.B. (2007)  
677 High-throughput binary vectors for plant gene function analysis. *Journal of Integrative Plant*  
678 *Biology* **49**, 556-567.
- 679 Li, Y., Ouyang, J., Wang, Y.-Y., Hu, R., Xia, K., Duan, J., Wang, Y., Tsay, Y.-F. and Zhang, M. (2015)  
680 Disruption of the rice nitrate transporter OsNPF2.2 hinders root-to-shoot nitrate transport and  
681 vascular development. *Scientific reports* **5**, 1-10.
- 682 Lim, S.H., Kim, D.H., Kim, J.K., Lee, J.Y. and Ha, S.H. (2017) A radish basic helix-loop-helix transcription  
683 factor, RsTT8 acts a positive regulator for anthocyanin biosynthesis. *Front Plant Sci* **8**, 1917.
- 684 Lin, H.X., Yang, Y.Q., Quan, R.D., Mendoza, I., Wu, Y.S., Du, W.M., Zhao, S.S., Schumaker, K.S., Pardo, J.M.  
685 and Guo, Y. (2009) Phosphorylation of SOS3-LIKE CALCIUM BINDING PROTEIN8 by SOS2 Protein  
686 Kinase Stabilizes Their Protein Complex and Regulates Salt Tolerance in Arabidopsis. *Plant Cell*  
687 **21**, 1607-1619.
- 688 Lin, Y.-J., Yu, X.-Z., Li, Y.-H. and Yang, L. (2020) Inhibition of the mitochondrial respiratory components  
689 (Complex I and Complex III) as stimuli to induce oxidative damage in *Oryza sativa* L. under  
690 thiocyanate exposure. *Chemosphere* **243**, 125472.
- 691 Lu, Y., Ye, X., Guo, R., Huang, J., Wang, W., Tang, J., Tan, L., Zhu, J.-k., Chu, C. and Qian, Y. (2017)  
692 Genome-wide targeted mutagenesis in rice using the CRISPR/Cas9 system. *Molecular Plant* **10**,  
693 1242-1245.
- 694 Luo, X., Dai, Y., Zheng, C., Yang, Y., Chen, W., Wang, Q., Chandrasekaran, U., Du, J., Liu, W. and Shu, K.  
695 (2021) The ABI4-RbohD/VTC2 regulatory module promotes reactive oxygen species (ROS)  
696 accumulation to decrease seed germination under salinity stress. *New Phytologist* **229**, 950-962.

- 697 Makino, A. (2011) Photosynthesis, grain yield, and nitrogen utilization in rice and wheat. *Plant Physiol*  
698 **155**, 125-129.
- 699 Manishankar, P., Wang, N., Koster, P., Alatar, A.A. and Kudla, J. (2018) Calcium Signaling during Salt  
700 Stress and in the Regulation of Ion Homeostasis. *Journal of Experimental Botany* **69**, 4215-4226.
- 701 Mansour, M. (2000) Nitrogen containing compounds and adaptation of plants to salinity stress. *Biologia*  
702 *Plantarum* **43**, 491-500.
- 703 Mao, J.-L., Miao, Z.-Q., Wang, Z., Yu, L.-H., Cai, X.-T. and Xiang, C.-B. (2016) Arabidopsis ERF1 mediates  
704 cross-talk between ethylene and auxin biosynthesis during primary root elongation by regulating  
705 ASA1 expression. *PLoS genetics* **12**, e1005760.
- 706 Martínez-Atienza, J., Jiang, X., Garcíadeblas, B., Mendoza, I., Zhu, J.-K., Pardo, J.M. and Quintero, F.J.  
707 (2007) Conservation of the salt overly sensitive pathway in rice. *Plant physiology* **143**, 1001-  
708 1012.
- 709 Moyle, R., Fairbairn, D.J., Ripi, J., Crowe, M. and Botella, J.R. (2005) Developing pineapple fruit has a  
710 small transcriptome dominated by metallothionein. *Journal of Experimental Botany* **56**, 101-112.
- 711 Munns, R. and Tester, M. (2008) Mechanisms of salinity tolerance. *Annu. Rev. Plant Biol.* **59**, 651-681.
- 712 Nasab, A.R., Pour, A.T. and Shirani, H. (2014) Effect of salinity and nitrogen application on growth,  
713 chemical composition and some biochemical indices of pistachio seedlings (*Pistacia vera* L.).  
714 *Journal of Plant Nutrition* **37**, 1612-1626.
- 715 O'Geen, H., Frieze, S. and Farnham, P.J. (2010) Using ChIP-seq technology to identify targets of zinc  
716 finger transcription factors. In: *Engineered Zinc Finger Proteins* pp. 437-455. Springer.
- 717 Pachamuthu, K., Hari Sundar, V., Narjala, A., Singh, R.R., Das, S., Avik Pal, H.C.Y. and Shivaprasad, P.V.  
718 (2022) Nitrate-dependent regulation of miR444-OsMADS27 signaling cascade controls root  
719 development in rice. *Journal of Experimental Botany* **erac083**.
- 720 Puig, J., Meynard, D., Khong, G.N., Pauluzzi, G., Guiderdoni, E. and Gantet, P. (2013) Analysis of the  
721 expression of the AGL17-like clade of MADS-box transcription factors in rice. *Gene Expression*  
722 *Patterns* **13**, 160-170.
- 723 Qadir, M., Quillérou, E., Nangia, V., Murtaza, G., Singh, M., Thomas, R.J., Drechsel, P. and Noble, A.D.  
724 (2014) Economics of salt-induced land degradation and restoration. In: *Natural resources forum*  
725 pp. 282-295. Wiley Online Library.
- 726 Qiu, Q.S., Guo, Y., Dietrich, M.A., Schumaker, K.S. and Zhu, J.K. (2002) Regulation of SOS1, a plasma  
727 membrane Na<sup>+</sup>/H<sup>+</sup> exchanger in Arabidopsis thaliana, by SOS2 and SOS3. *P Natl Acad Sci USA*  
728 **99**, 8436-8441.
- 729 Raddatz, N., Morales de Los Rios, L., Lindahl, M., Quintero, F.J. and Pardo, J.M. (2020) Coordinated  
730 Transport of Nitrate, Potassium, and Sodium. *Frontiers in Plant Science* **11**, 247.
- 731 Rais, L., Masood, A., Inam, A. and Khan, N. (2013) Sulfur and nitrogen co-ordinately improve  
732 photosynthetic efficiency, growth and proline accumulation in two cultivars of mustard under  
733 salt stress. *Journal of Plant Biochemistry & Physiology*.
- 734 Rosas-Santiago, P., Lagunas-Gómez, D., Barkla, B.J., Vera-Estrella, R., Lalonde, S., Jones, A., Frommer,  
735 W.B., Zimmermannova, O., Sychrová, H. and Pantoja, O. (2015) Identification of rice cornichon  
736 as a possible cargo receptor for the Golgi-localized sodium transporter OsHKT1; 3. *Journal of*  
737 *experimental botany* **66**, 2733-2748.
- 738 Saeng-ngam, S., Takpirom, W., Buaboocha, T. and Chadchawan, S. (2012) The role of the OsCam1-1 salt  
739 stress sensor in ABA accumulation and salt tolerance in rice. *Journal of Plant Biology* **55**, 198-  
740 208.
- 741 Schmidt, R., Schippers, J.H., Mieulet, D., Obata, T., Fernie, A.R., Guiderdoni, E. and Mueller-Roeber, B.  
742 (2013) MULTIPASS, a rice R2R3-type MYB transcription factor, regulates adaptive growth by  
743 integrating multiple hormonal pathways. *Plant Journal* **76**, 258-273.

- 744 Suzuki, K., Yamaji, N., Costa, A., Okuma, E., Kobayashi, N.I., Kashiwagi, T., Katsuhara, M., Wang, C., Tanoi,  
745 K. and Murata, Y. (2016a) OsHKT1; 4-mediated Na<sup>+</sup> transport in stems contributes to Na<sup>+</sup>  
746 exclusion from leaf blades of rice at the reproductive growth stage upon salt stress. *BMC plant*  
747 *biology* **16**, 1-15.
- 748 Suzuki, N., Bassil, E., Hamilton, J.S., Inupakutika, M.A., Zandalinas, S.I., Tripathy, D., Luo, Y., Dion, E.,  
749 Fukui, G., Kumazaki, A., Nakano, R., Rivero, R.M., Verbeck, G.F., Azad, R.K., Blumwald, E. and  
750 Mittler, R. (2016b) ABA Is Required for Plant Acclimation to a Combination of Salt and Heat  
751 Stress. *PLoS One* **11**, e0147625.
- 752 Tian, Q., Shen, L., Luan, J., Zhou, Z., Guo, D., Shen, Y., Jing, W., Zhang, B., Zhang, Q. and Zhang, W. (2021)  
753 Rice shaker potassium channel OsAKT2 positively regulates salt tolerance and grain yield by  
754 mediating K(+) redistribution. *Plant Cell and Environment* **44**, 2951-2965.
- 755 Wang, J., Wan, R., Nie, H., Xue, S. and Fang, Z. (2021) OsNPF5. 16, a nitrate transporter gene with natural  
756 variation, is essential for rice growth and yield. *The Crop Journal*.
- 757 Wang, R., Jing, W., Xiao, L., Jin, Y., Shen, L. and Zhang, W. (2015) The rice high-affinity potassium  
758 transporter1; 1 is involved in salt tolerance and regulated by an MYB-type transcription factor.  
759 *Plant Physiology* **168**, 1076-1090.
- 760 Wei, J., Zheng, Y., Feng, H., Qu, H., Fan, X., Yamaji, N., Ma, J.F. and Xu, G. (2018) OsNRT2. 4 encodes a  
761 dual-affinity nitrate transporter and functions in nitrate-regulated root growth and nitrate  
762 distribution in rice. *Journal of experimental botany* **69**, 1095-1107.
- 763 Wu, H., Zhang, X., Giraldo, J.P. and Shabala, S. (2018) It is not all about sodium: revealing tissue  
764 specificity and signalling roles of potassium in plant responses to salt stress. *Plant and Soil* **431**,  
765 1-17.
- 766 Wu, J., Yu, C., Hunag, L., Wu, M., Liu, B., Liu, Y., Song, G., Liu, D. and Gan, Y. (2020) Overexpression of  
767 MADS-box transcription factor OsMADS25 enhances salt stress tolerance in Rice and  
768 Arabidopsis. *Plant Growth Regulation* **90**, 163-171.
- 769 Wu, J., Zhang, Z.S., Xia, J.Q., Alfatih, A., Song, Y., Huang, Y.J., Wan, G.Y., Sun, L.Q., Tang, H., Liu, Y., Wang,  
770 S.M., Zhu, Q.S., Qin, P., Wang, Y.P., Li, S.G., Mao, C.Z., Zhang, G.Q., Chu, C., Yu, L.H. and Xiang,  
771 C.B. (2021) Rice NIN-LIKE PROTEIN 4 plays a pivotal role in nitrogen use efficiency. *Plant*  
772 *Biotechnol Journal* **19**, 448-461.
- 773 Wu, R., Tomes, S., Karunairetnam, S., Tustin, S.D., Hellens, R.P., Allan, A.C., Macknight, R.C. and  
774 Varkonyi-Gasic, E. (2017) SVP-like MADS Box Genes Control Dormancy and Budbreak in Apple.  
775 *Frontiers in Plant Science* **8**, 477.
- 776 Xiang, C., Han, P., Lutziger, I., Wang, K. and Oliver, D.J. (1999) A mini binary vector series for plant  
777 transformation. *Plant molecular biology* **40**, 711-717.
- 778 Yamaguchi-Shinozaki, K. and Shinozaki, K. (2006) Transcriptional regulatory networks in cellular  
779 responses and tolerance to dehydration and cold stresses. *Annu. Rev. Plant Biol.* **57**, 781-803.
- 780 Yang, Y.Q. and Guo, Y. (2018a) Elucidating the molecular mechanisms mediating plant salt-stress  
781 responses. *New Phytol* **217**, 523-539.
- 782 Yang, Y.Q. and Guo, Y. (2018b) Unraveling salt stress signaling in plants. *J Integr Plant Biol* **60**, 796-804.
- 783 Yin, X., Liu, X., Xu, B., Lu, P., Dong, T., Yang, D., Ye, T., Feng, Y.Q. and Wu, Y. (2019) OsMADS18, a  
784 membrane-bound MADS-box transcription factor, modulates plant architecture and the abscisic  
785 acid response in rice. *Journal of Experimental Botany* **70**, 3895-3909.
- 786 Yu, C., Liu, Y., Zhang, A., Su, S., Yan, A., Huang, L., Ali, I., Liu, Y., Forde, B.G. and Gan, Y. (2015) MADS-box  
787 transcription factor OsMADS25 regulates root development through affection of nitrate  
788 accumulation in rice. *PLoS One* **10**, e0135196.
- 789 Yu, C., Su, S., Xu, Y., Zhao, Y., Yan, A., Huang, L., Ali, I. and Gan, Y. (2014) The effects of fluctuations in the  
790 nutrient supply on the expression of five members of the AGL17 clade of MADS-box genes in  
791 rice. *PLoS One* **9**, e105597.

- 792 Yu, L.-H., Wu, J., Zhang, Z.-S., Miao, Z.-Q., Zhao, P.-X., Wang, Z. and Xiang, C.-B. (2017) Arabidopsis  
793 MADS-box transcription factor AGL21 acts as environmental surveillance of seed germination by  
794 regulating ABI5 expression. *Molecular plant* **10**, 834-845.
- 795 Zhang, H. and Forde, B.G. (1998) An Arabidopsis MADS box gene that controls nutrient-induced changes  
796 in root architecture. *Science* **279**, 407-409.
- 797 Zhang, H., Yang, B., Liu, J., Guo, D., Hou, J., Chen, S., Song, B. and Xie, C. (2017) Analysis of structural  
798 genes and key transcription factors related to anthocyanin biosynthesis in potato tubers.  
799 *Scientia Horticulturae* **225**, 310-316.
- 800 Zhang, Y., Fang, J., Wu, X. and Dong, L. (2018) Na<sup>+</sup>/K<sup>+</sup> balance and transport regulatory mechanisms in  
801 weedy and cultivated rice (*Oryza sativa* L.) under salt stress. *BMC plant biology* **18**, 1-14.
- 802 Zhao, P.-X., Miao, Z.-Q., Zhang, J., Chen, S.-Y., Liu, Q.-Q. and Xiang, C.-B. (2020) Arabidopsis MADS-box  
803 factor AGL16 negatively regulates drought resistance via stomatal density and stomatal  
804 movement. *Journal of Experimental Botany* **71**, 6092-6106.
- 805 Zhao, P.X., Zhang, J., Chen, S.Y., Wu, J., Xia, J.Q., Sun, L.Q., Ma, S.S. and Xiang, C.B. (2021) Arabidopsis  
806 MADS-box factor AGL16 is a negative regulator of plant response to salt stress by  
807 downregulating salt-responsive genes. *New Phytologist* **232**, 2418-2439.
- 808 Zheng, Y., Jia, A., Ning, T., Xu, J., Li, Z. and Jiang, G. (2008) Potassium nitrate application alleviates  
809 sodium chloride stress in winter wheat cultivars differing in salt tolerance. *J Plant Physiol* **165**,  
810 1455-1465.
- 811 Zhou, X., Jenks, M.A., Liu, J., Liu, A., Zhang, X., Xiang, J., Zou, J., Peng, Y. and Chen, X. (2013)  
812 Overexpression of Transcription Factor OsWR2 Regulates Wax and Cutin Biosynthesis in Rice  
813 and Enhances its Tolerance to Water Deficit. *Plant Molecular Biology Reporter* **32**, 719-731.
- 814 Zhu, J.K., Liu, J.P. and Xiong, L.M. (1998) Genetic analysis of salt tolerance in Arabidopsis: Evidence for a  
815 critical role of potassium nutrition. *Plant Cell* **10**, 1181-1191.
- 816 Zorb, C., Senbayram, M. and Peiter, E. (2014) Potassium in Agriculture: Status and Perspectives. *Journal*  
817 *of Plant Physiology* **171**, 656–669.
- 818 Zou, M., Guan, Y., Ren, H., Zhang, F. and Chen, F. (2008) A bZIP transcription factor, OsABI5, is involved  
819 in rice fertility and stress tolerance. *Plant molecular biology* **66**, 675-683.
- 820

## 821 **Figure Legends**

### 822 **Figure 1. *OsMADS27* is specifically responsive to nitrate.**

823 A. Time-course analyses of *OsMADS27* expression in response to N and salt stress. 7-day-old  
824 wild type plants grown on hydroponic medium with 1.5 mM KNO<sub>3</sub> were transferred to  
825 hydroponic medium without N for 2 days, and then transferred to hydroponic medium with 2  
826 mM KNO<sub>3</sub>, 2 mM NH<sub>4</sub>Cl, 140 mM NaCl or 2 mM KCl for 0, 0.5, 3, 12, 24 hours. RNA was  
827 extracted from the whole seedlings for qRT-PCR analyses as described in the Materials and  
828 method. Values are mean ± SD (n = 3).

829 B. Time-course analyses of *OsMADS27* expression in response to KNO<sub>3</sub> depletion. 7-day-old  
830 wild type plants grown under on hydroponic medium with 1.5 mM KNO<sub>3</sub> were treated with 2  
831 mM KNO<sub>3</sub> for 0, 0.5, 1, 3 hours, then transferred to hydroponic medium without KNO<sub>3</sub> for 3,  
832 6, 12, 24 hours. RNA was extracted from the whole seedlings for qRT-PCR analyses as  
833 described in the Materials and method. Values are mean ± SD (n = 3).

834 C. KNO<sub>3</sub>-dependent induction of *OsMADS27* expression by NaCl. Wild type seedlings  
835 hydroponically grown on N-free medium for 7 days were treated with 140 mM NaCl for 0,  
836 0.5, 1, 3 hours, and then transferred to hydroponic medium with 140 mM NaCl + 2 mM  
837 KNO<sub>3</sub> for 0.5, 1, 3 hours. RNA was extracted from the whole seedlings for qRT-PCR  
838 analyses as described in the Materials and method. Values are mean ± SD (n = 3).

839 D-E. The response of *OsMADS27pro:GUS* to NaCl. 7-day-old *OsMADS27pro:GUS* lines grown  
840 on N-free medium with 2 mM KCl (D) or 2 mM KNO<sub>3</sub> (E) were treated with 140 mM NaCl  
841 for 0.5, 1, 3 hours, respectively. Seedlings were incubated in GUS buffer for 3 hours before  
842 photographs were taken. Bar = 1 cm

843 F. *OsMADS27* protein level in *OsMADS27pro:OsMADS27-GFP* plants. 2-week-old  
844 *OsMADS27pro :OsMADS27-GFP* seedlings grown hydroponically on medium contains  
845 different N concentrations (0.02 mM, 0.2 mM and 2 mM KNO<sub>3</sub>) without (control) or with 100  
846 mM NaCl were used for the analysis of *OsMADS27* protein level by western blot with anti-  
847 GFP antibodies. ZH11 (WT) grown on medium with 2 mM KNO<sub>3</sub> served as a control.

### 848 **Figure 2. Nitrate-responsive nuclear localization of *OsMADS27*.**

849 *OsMADS27pro:OsMADS27-GFP* plants were grown on N-free MS medium supplied with 2 mM  
850 KNO<sub>3</sub> (A) or 2 mM KCl (C) for 10 days. The seedlings in A were treated with 150 mM NaCl  
851 (B) for 60 min before green fluorescence observation. The seedlings in C were treated with 2  
852 mM KNO<sub>3</sub> (D), 2 mM NH<sub>4</sub>Cl (E), 150 mM NaCl (F), and 150 mM NaCl + 2 mM KNO<sub>3</sub> (G)  
853 respectively for 60 min before GFP observation. The green fluorescence was observed on the  
854 Zeiss 880 microscope. Scale bars = 20 μm.

855 **Figure 3. Nitrate-dependent salt tolerance of seedlings**

856 A-D. Hydroponic salt tolerance assay. Seeds of WT (ZH11), KO1, KO2 mutants, OE7 and OE8  
857 lines were germinated at 37 °C for 4 days and transferred to modified hydroponic medium  
858 containing different N concentration (0.02 mM, 0.2 mM, 2 mM KNO<sub>3</sub>) for 7 days followed by  
859 application of 0 mM, 140 mM NaCl for 7 days before photographs were taken (A-B), and  
860 survival rate was calculated (C-D). Values are mean ± SD (n=3 replicates, 32 seedlings per  
861 replicate).

862 **Figure 4. Transcriptomic analysis of differentially expressed genes (DEGs) affected by**  
863 **OsMADS27.**

864 A. The number of differentially expressed genes (DEGs). The statistics data of differentially  
865 expressed genes in (KO vs WT)-control, (OE vs WT)-control, (KO vs WT)-salt, and (OE vs  
866 WT)-salt groups.  
867 B. Venn diagram of differentially expressed genes (DEGs) among (KO vs WT)-control, (OE vs  
868 WT)-control, (KO vs WT)-salt, and (OE vs WT)-salt groups. The numbers represent the total  
869 numbers of differentially expressed genes in different comparison groups.  
870 C. Hierarchical clustering analysis of N and salt stress-related genes affected by OsMADS27 in  
871 DEGs. The heatmap represents fold changes in the abundance of gene transcripts in different  
872 comparison groups.

873 **Figure 5. OsMADS27 activates *OsHKT1.1* and *OsSPL7* by binding to the CArG motif in**  
874 **their promoter.**

875 A-B. ChIP-qPCR assay. The enrichment of the fragments containing CArG motifs (marked with  
876 asterisks) in promoters of *OsHKT1.1* and *OsSPL7* was checked in

877 *OsMADS27pro:OsMADS27-GFP* and wild type plants. About 200 bp fragment *cis1* and *cis2*  
878 of *OsHKT1.1* promoter (A), *cis2* and *cis3* of *OsSPL7* promoter (B) were enriched in  
879 *OsMADS27pro:OsMADS27-GFP* plants by anti-GFP antibodies as shown in qRT-PCR  
880 analyses. Values are mean  $\pm$  SD (n=3 replicates). Different letters denote significant  
881 differences ( $P < 0.05$ ) from Duncan's multiple range tests.

882 C-D. Luciferase activity assay. pRI101- *OsMADS27* acts as effector. pGreenII0800-  
883 *OsHKT1.1pro::LUC* / *OsSPL7pro::LUC* function as reporters. “-/-” represents pRI101 and  
884 pGreenII 0800 empty plasmids. “-/-”, “OsMADS27/-”, “-/*OsHKT1.1pro::LUC*”, “-/  
885 /*OsSPL7pro::LUC*” as negative controls; “OsMADS27/*OsHKT1.1pro::LUC*” (E),  
886 “OsMADS27/ *OsSPL7pro::LUC*” (F) as experimental groups. Different constructs were  
887 separately coinfiltrated into 4-week-old tobacco leaves, then the luciferase activity was  
888 detected by the luciferase assay system.

889 **Figure 6. OsNLP4 binds to the promoter of *OsMADS27* and activates its expression.**

890 A. qRT-PCR analysis of *OsMADS27* expression in wild type, *nlp4* mutants and *OsNLP4-OE*  
891 lines. Seeds were germinated and grown in the hydroponic medium for 16 days before RNA  
892 isolation from the whole seedling. Values are mean  $\pm$  SD (n=3 replicates). Different letters  
893 denote significant differences ( $P < 0.05$ ) from Duncan's multiple range tests.

894 B. ChIP-qPCR assay. The enrichment of the fragments containing NRE motif (marked with  
895 asterisks) in promoters of *OsMADS27* was checked in *OsACTIN1pro:OsNLP4-GFP* plants  
896 and wild type. About 200 bp *cis1* and *cis3* of *OsMADS27* promoter were enriched in  
897 *OsACTIN1pro:OsNLP4-GFP* plants by anti-GFP antibodies as shown in qRT-PCR analyses.  
898 Values are mean  $\pm$  SD (n=3 replicates). Different letters denote significant differences ( $P <$   
899 0.05) from Duncan's multiple range tests.

900 C. EMSA assay. Recombinant MBP-NLP4 protein was purified from *E. coli* cells and used for  
901 DNA binding assays with the promoter of *OsMADS27*. Competition for OsNLP4 binding was  
902 conducted with 5 $\times$ , 10 $\times$ , 50 $\times$  unlabeled *OsMADS27* probes. Shifted bands are indicated by  
903 asterisk.



904 D. Transient transactivation assay. pRI101- *OsNLP4* acts as effector. pGreenII0800-  
905 *OsMADS27pro::LUC* function as reporters. “-/-” represents pRI101 and pGreenII 0800 empty  
906 plasmids. “-/-”, “-/*OsMADS27pro::LUC*”, “*OsNLP4*/-” as negative controls;  
907 “*OsNLP4/OsMADS27pro::LUC*” as experimental group. Different constructs were separately  
908 coinfiltrated into 4-week-old tobacco leaves, then the luciferase activity was detected by the  
909 luciferase assay system.

910 **Figure 7. A working model of nitrate-dependent salt tolerance mediated by OsNLP4-**  
911 **OsMADS27 module.**

912 A. Under nitrate sufficient condition, nitrate triggers *OsNLP4* production and nuclear  
913 localization, consequently activating the expression of *OsMADS27*, leading to high level of  
914 *OsMADS27* that directly binds to the promoters of its target genes such as *OsHKT1.1* and  
915 *OsSPL7*, significantly enhancing their expression and improving the salt tolerance of rice.  
916 B. Under nitrate deficient condition, less *OsNLP4* protein is produced and the vast majority of  
917 *OsNLP4* protein is localized in the cytoplasm, resulting in a relatively low expression of  
918 *OsMADS27*, thereby attenuating the downstream salt tolerance-related genes.

919

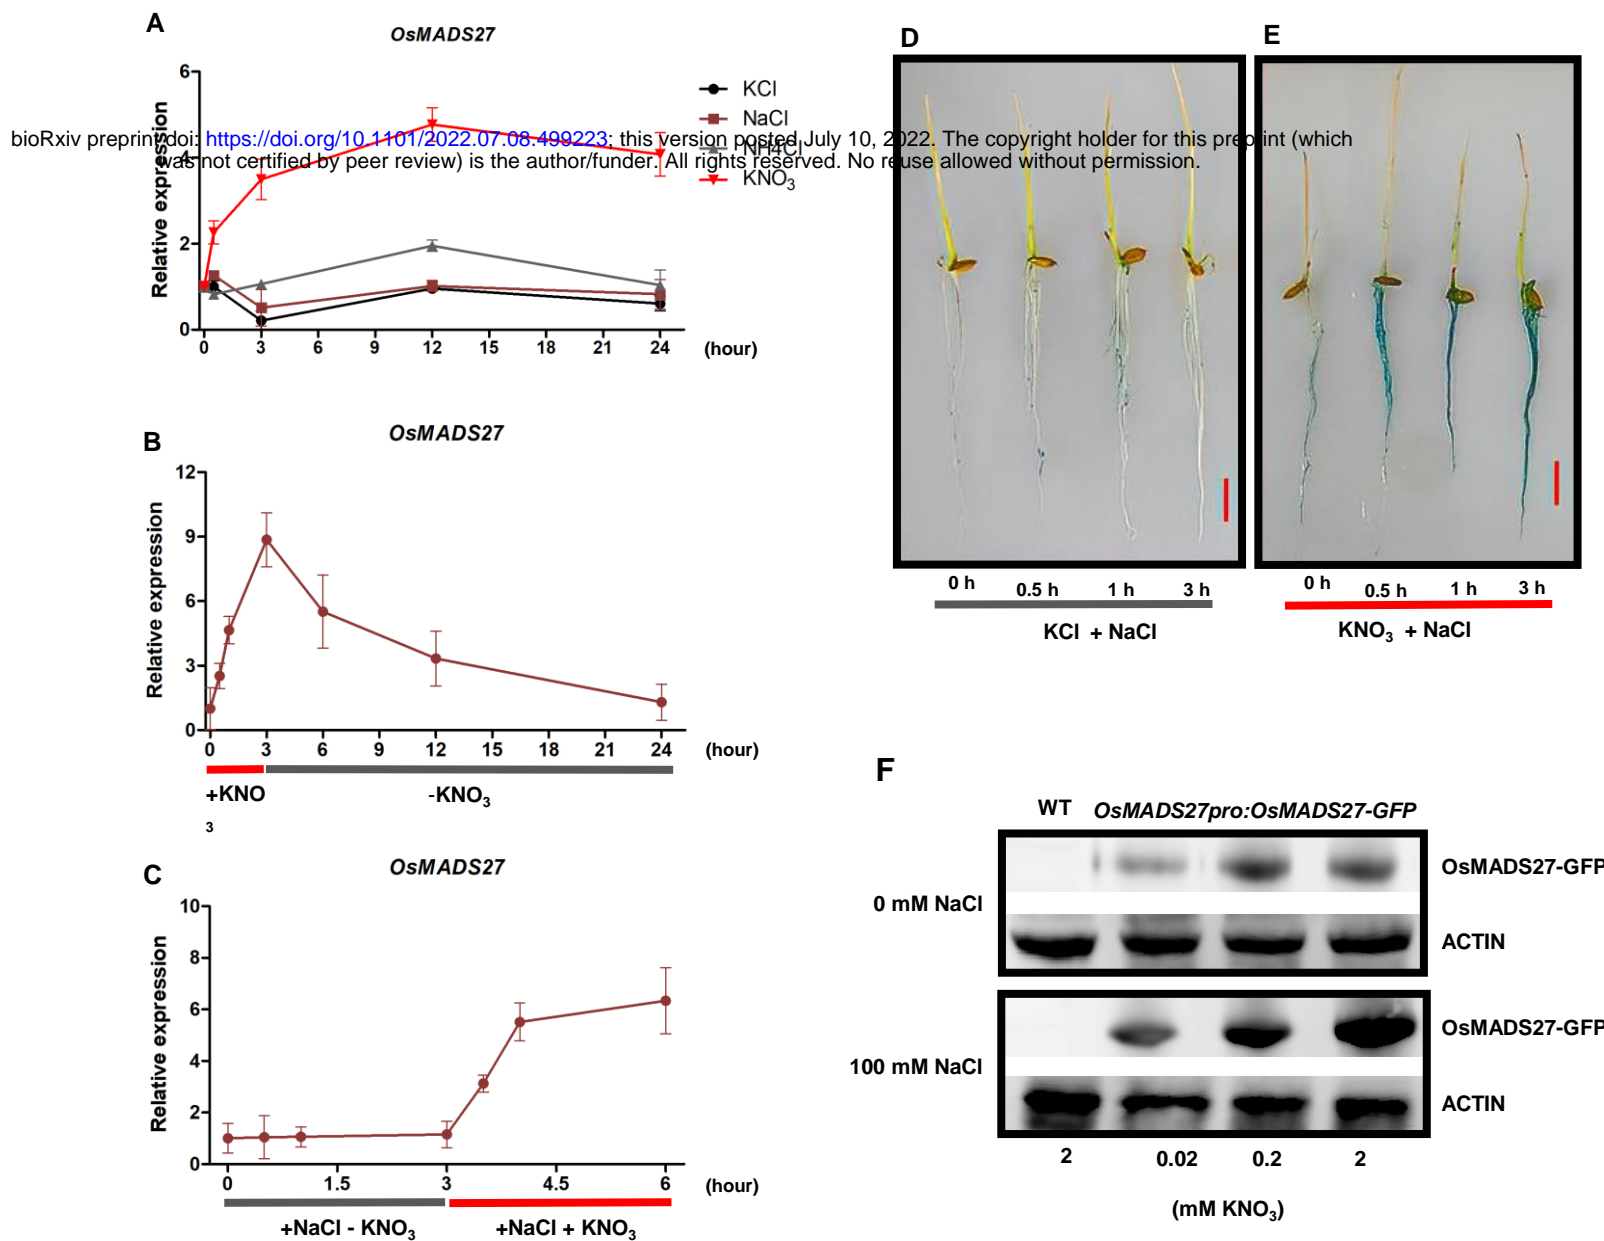

**Figure 1. *OsMADS27* is specifically responsive to nitrate.**

- A. Time-course analyses of *OsMADS27* expression in response to N and salt stress. 7-day-old wild type plants grown on hydroponic medium with 1.5 mM KNO<sub>3</sub> were transferred to hydroponic medium without N for 2 days, and then transferred to hydroponic medium with 2 mM KNO<sub>3</sub>, 2 mM NH<sub>4</sub>Cl, 140 mM NaCl or 2 mM KCl for 0, 0.5, 3, 12, 24 hours. RNA was extracted from the whole seedlings for qRT-PCR analyses as described in the Materials and method. Values are mean ± SD (n = 3).
- B. Time-course analyses of *OsMADS27* expression in response to KNO<sub>3</sub> depletion. 7-day-old wild type plants grown under on hydroponic medium with 1.5 mM KNO<sub>3</sub> were treated with 2 mM KNO<sub>3</sub> for 0, 0.5, 1, 3 hours, then transferred to hydroponic medium without KNO<sub>3</sub> for 3, 6, 12, 24 hours. RNA was extracted from the whole seedlings for qRT-PCR analyses as described in the Materials and method. Values are mean ± SD (n = 3).
- C. KNO<sub>3</sub>-dependent induction of *OsMADS27* expression by NaCl. Wild type seedlings hydroponically grown on N-free medium for 7 days were treated with 140 mM NaCl for 0, 0.5, 1, 3 hours, and then transferred to hydroponic medium with 140 mM NaCl + 2 mM KNO<sub>3</sub> for 0.5, 1, 3 hours. RNA was extracted from the whole seedlings for qRT-PCR analyses as described in the Materials and method. Values are mean ± SD (n = 3).
- D-E. The response of *OsMADS27pro:GUS* to NaCl. 7-day-old *OsMADS27pro:GUS* lines grown on N-free medium with 2 mM KCl (D) or 2 mM KNO<sub>3</sub> (E) were treated with 140 mM NaCl for 0.5, 1, 3 hours, respectively. Seedlings were incubated in GUS buffer for 3 hours before photographs were taken. Bar = 1 cm
- F. *OsMADS27* protein level in *OsMADS27pro:OsMADS27-GFP* plants. 2-week-old *OsMADS27pro :OsMADS27-GFP* seedlings grown hydroponically on medium contains different N concentrations (0.02 mM, 0.2 mM and 2 mM KNO<sub>3</sub>) without (control) or with 100 mM NaCl were used for the analysis of *OsMADS27* protein level by western blot with anti-GFP antibodies. ZH11 (WT) grown on medium with 2 mM KNO<sub>3</sub> served as a control.

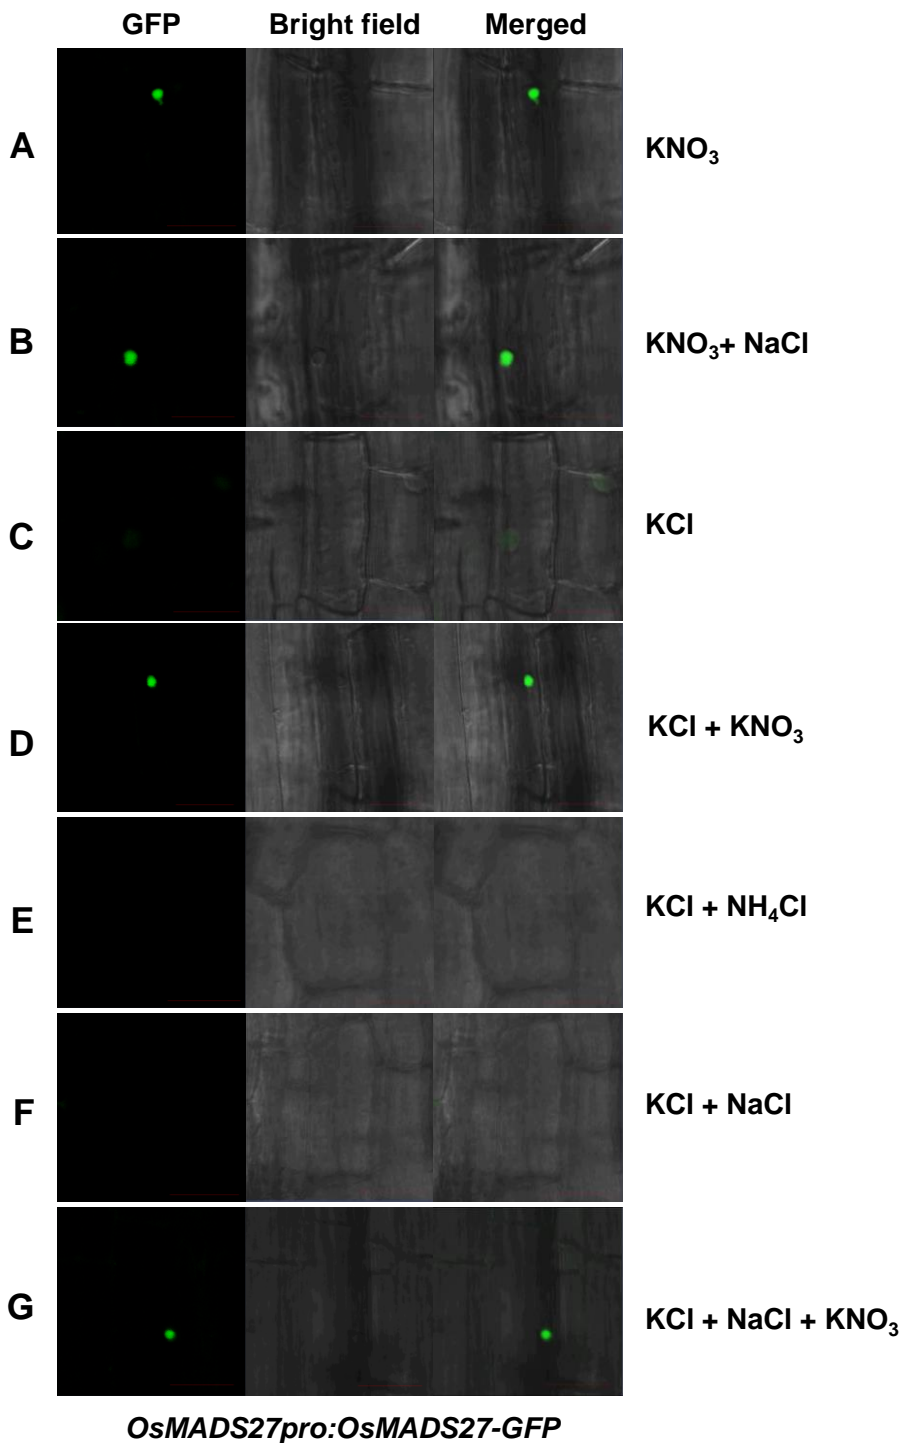

**Figure 2. Nitrate-responsive nuclear localization of *OsMADS27*.**

*OsMADS27pro:OsMADS27-GFP* plants were grown on N-free MS medium supplied with 2 mM KNO<sub>3</sub> (A) or 2 mM KCl (C) for 10 days. The seedlings in A were treated with 150 mM NaCl (B) for 60 min before green fluorescence observation. The seedlings in C were treated with 2 mM KNO<sub>3</sub> (D), 2 mM NH<sub>4</sub>Cl (E), 150 mM NaCl (F), and 150 mM NaCl + 2 mM KNO<sub>3</sub> (G) respectively for 60 min before GFP observation. The green fluorescence was observed on the Zeiss 880 microscope. Scale bars = 20 μm.

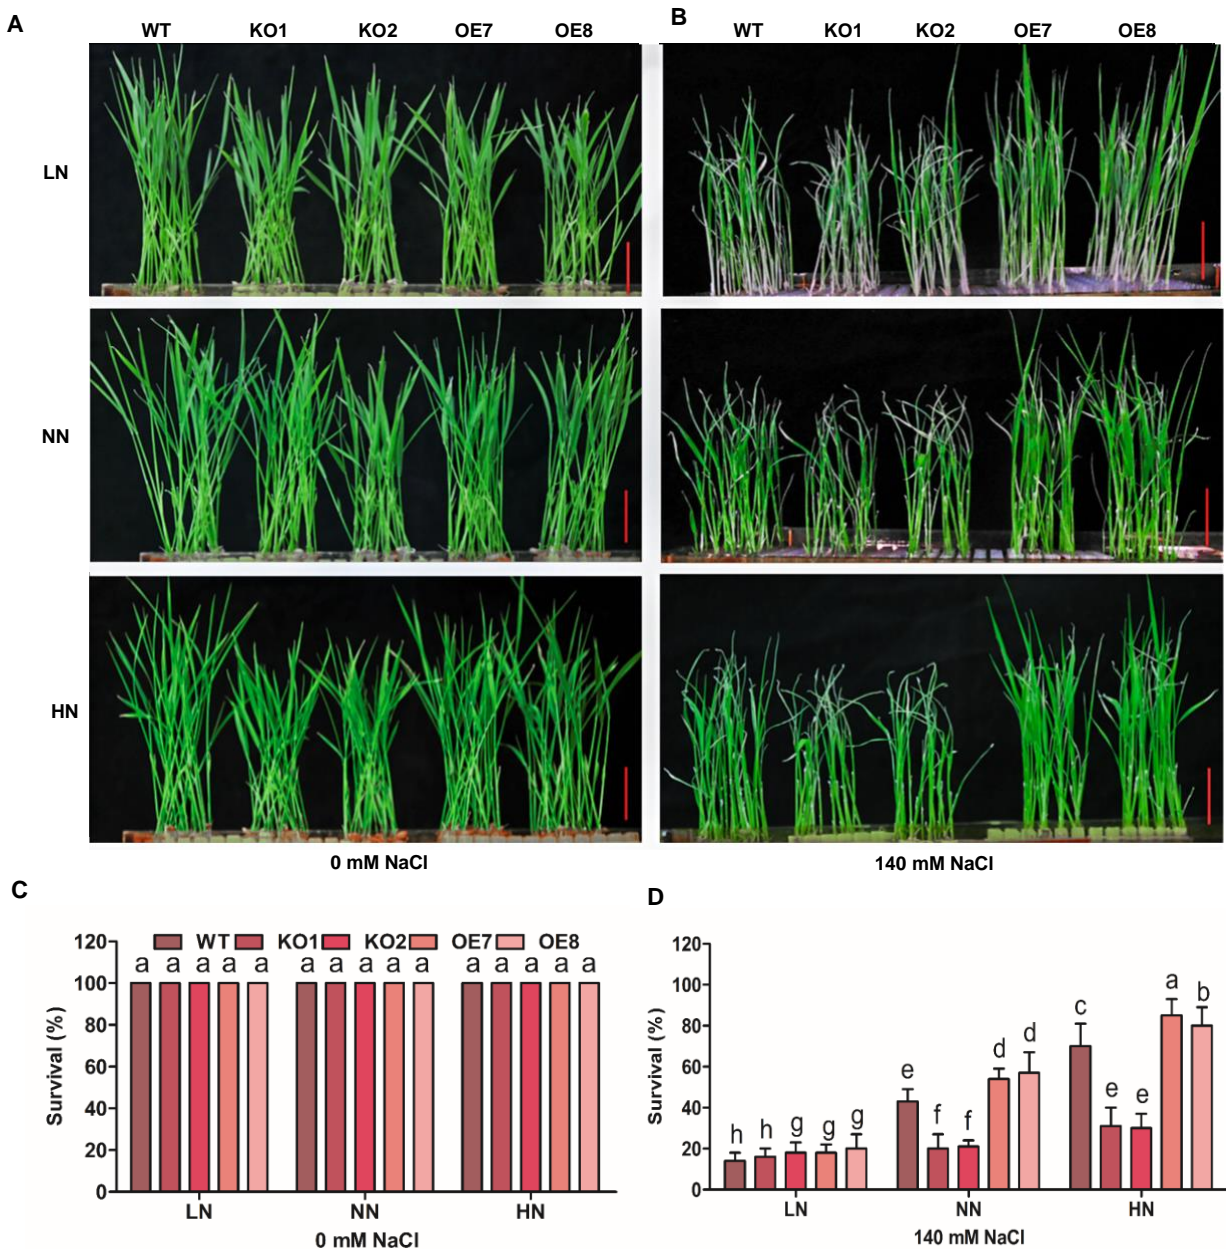

**Figure 3. Nitrate-dependent salt tolerance of seedlings**

A-D. Hydroponic salt tolerance assay. Seeds of WT (ZH11), KO1, KO2 mutants, OE7 and OE8 lines were germinated at 37 °C for 4 days and transferred to modified hydroponic medium containing different N concentration (0.02 mM, 0.2 mM, 2 mM KNO<sub>3</sub>) for 7 days followed by application of 0 mM, 140 mM NaCl for 7 days before photographs were taken (A-B), and survival rate was calculated (C-D). Values are mean ± SD (n=3 replicates, 32 seedlings per replicate).

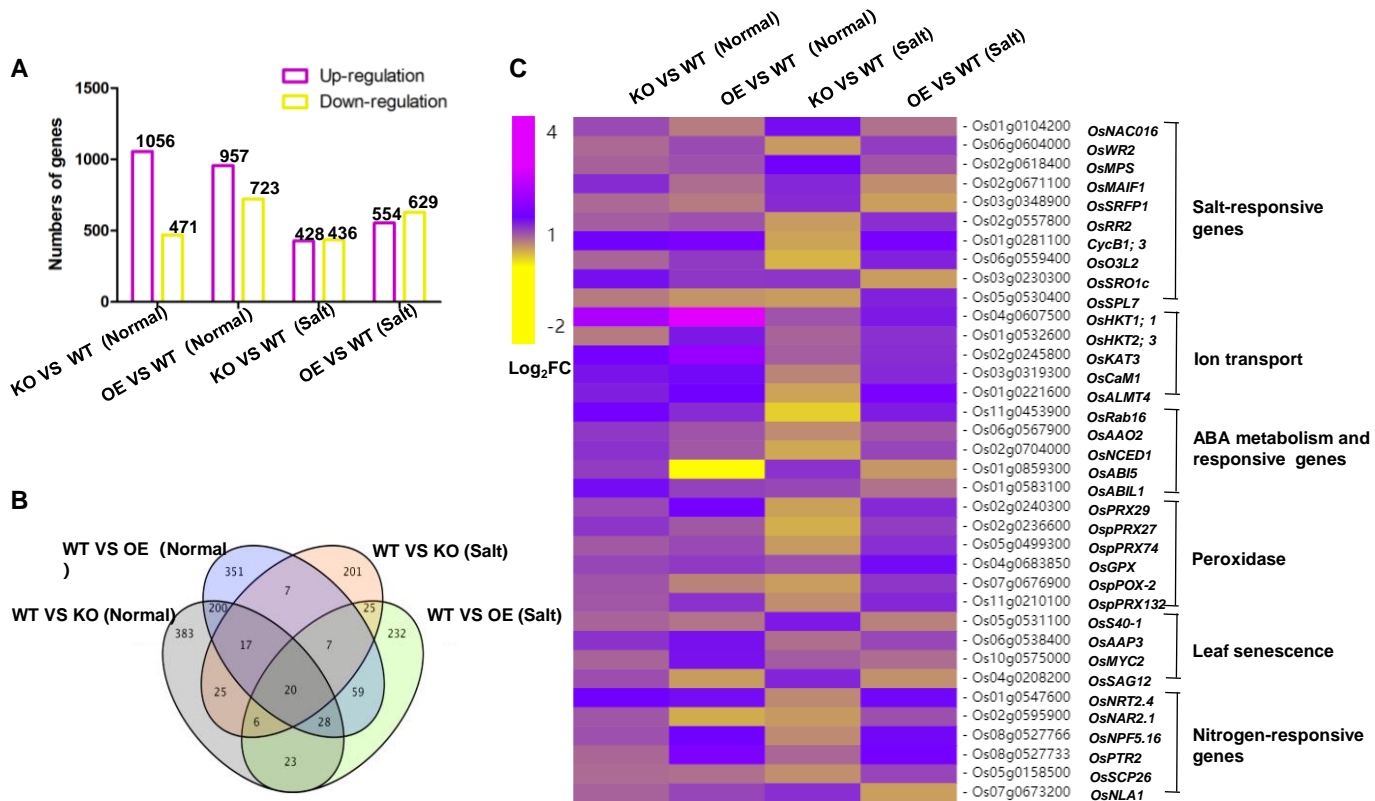

**Figure 4. Transcriptomic analysis of differentially expressed genes (DEGs) affected by OsMADS27.**

- A. The number of differentially expressed genes (DEGs). The statistics data of differentially expressed genes in (KO vs WT)-control, (OE vs WT)-control, (KO vs WT)-salt, and (OE vs WT)-salt groups.
- B. Venn diagram of differentially expressed genes (DEGs) among (KO vs WT)-control, (OE vs WT)-control, (KO vs WT)-salt, and (OE vs WT)-salt groups. The numbers represent the total numbers of differentially expressed genes in different comparison groups.
- C. Hierarchical clustering analysis of N and salt stress-related genes affected by OsMADS27 in DEGs. The heatmap represents fold changes in the abundance of gene transcripts in different comparison groups.



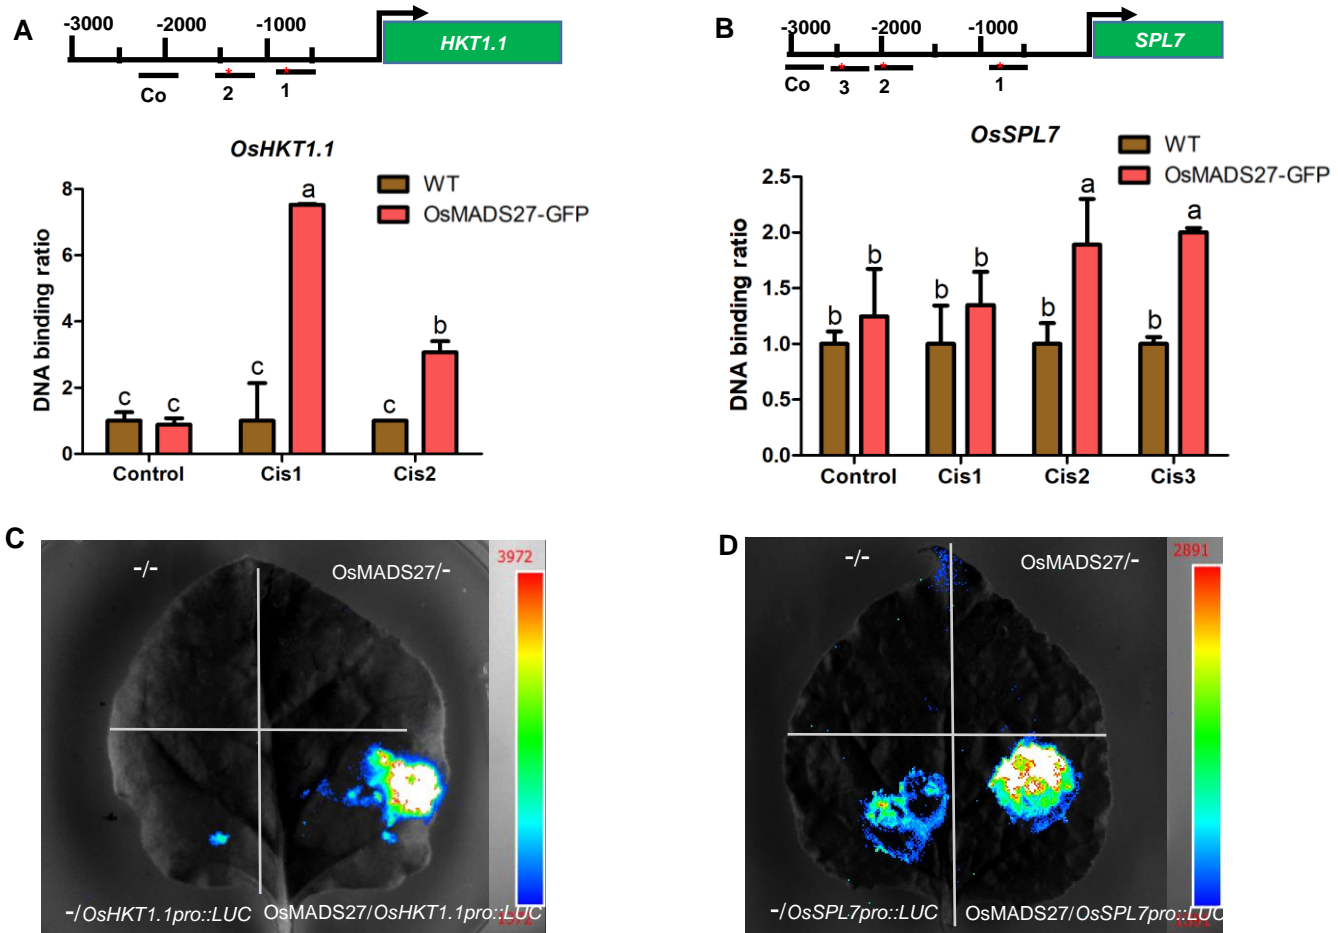

**Figure 5. OsMADS27 activates *OsHKT1.1* and *OsSPL7* by binding to the CARG motif in their promoter.**

A-B. ChIP-qPCR assay. The enrichment of the fragments containing CARG motifs (marked with asterisks) in promoters of *OsHKT1.1* and *OsSPL7* was checked in *OsMADS27pro:OsMADS27-GFP* and wild type plants. About 200 bp fragment *cis1* and *cis2* of *OsHKT1.1* promoter (A), *cis2* and *cis3* of *OsSPL7* promoter (B) were enriched in *OsMADS27pro:OsMADS27-GFP* plants by anti-GFP antibodies as shown in qRT-PCR analyses. Values are mean  $\pm$  SD (n=3 replicates). Different letters denote significant differences ( $P < 0.05$ ) from Duncan's multiple range tests.

C-D. Luciferase activity assay. pRI101- *OsMADS27* acts as effector. pGreenII0800- *OsHKT1.1pro::LUC* / *OsSPL7pro::LUC* function as reporters. “-/-” represents pRI101 and pGreenII 0800 empty plasmids. “-/-”, “*OsMADS27/-*”, “*-/OsHKT1.1pro::LUC*”, “*-/OsSPL7pro::LUC*” as negative controls; “*OsMADS27/OsHKT1.1pro::LUC*” (E), “*OsMADS27/OsSPL7pro::LUC*” (F) as experimental groups. Different constructs were separately coinfiltrated into 4-week-old tobacco leaves, then the luciferase activity was detected by the luciferase assay system.

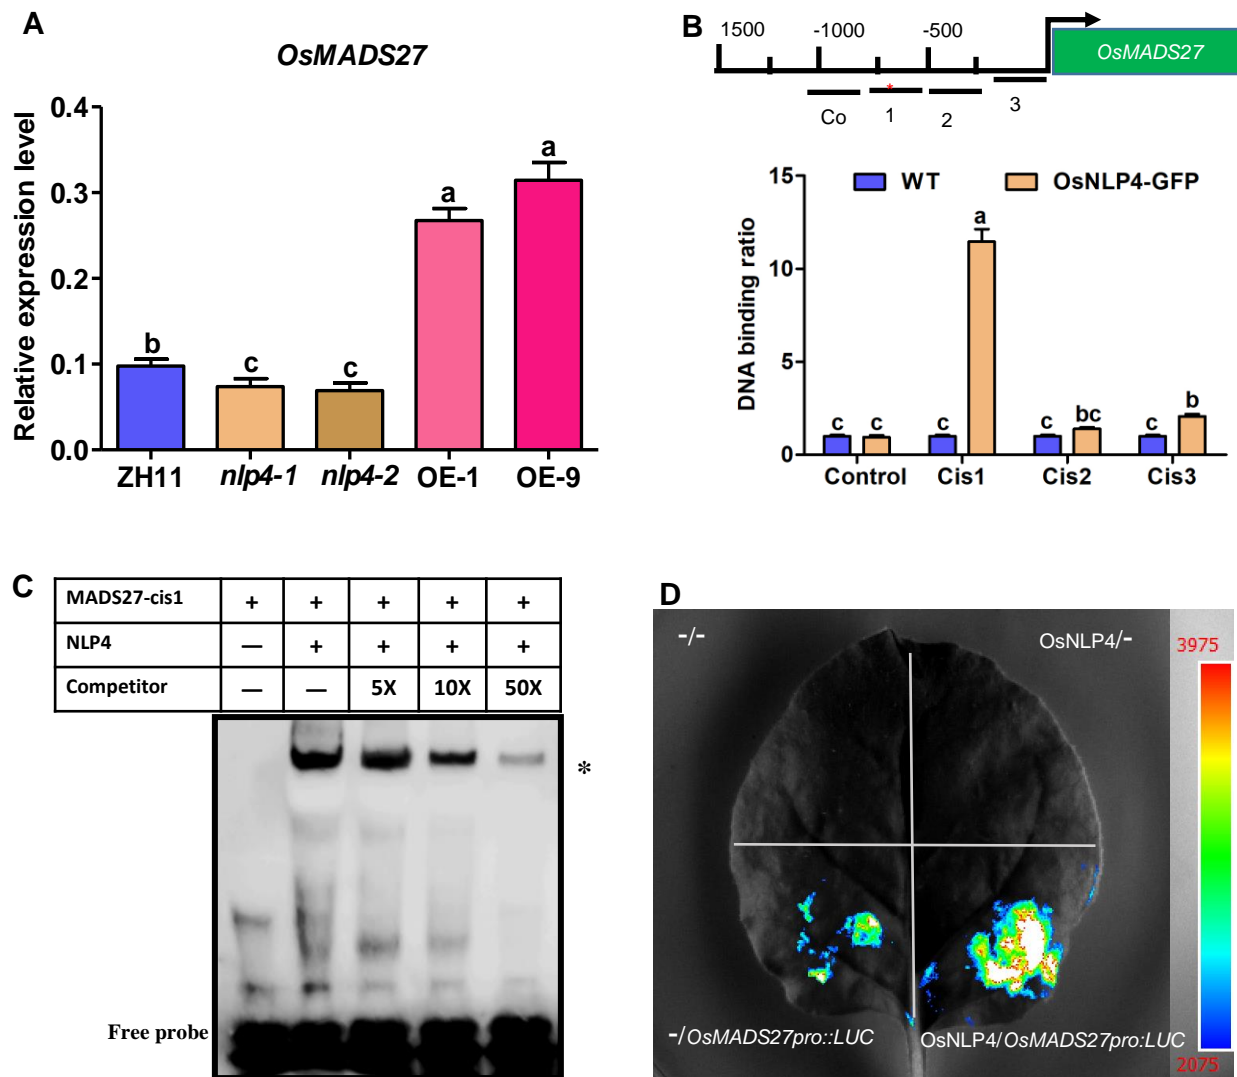

**Figure 6. OsNLP4 binds to the promoter of *OsMADS27* and activates its expression.**

- A. qRT-PCR analysis of *OsMADS27* expression in wild type, *nlp4* mutants and *OsNLP4*-OE lines. Seeds were germinated and grown in the hydroponic medium for 16 days before RNA isolation from the whole seedling. Values are mean  $\pm$  SD (n=3 replicates). Different letters denote significant differences ( $P < 0.05$ ) from Duncan's multiple range tests.
- B. ChIP-qPCR assay. The enrichment of the fragments containing NRE motif (marked with asterisks) in promoters of *OsMADS27* was checked in *OsACTIN1**pro::OsNLP4-GFP* plants and wild type. About 200 bp *cis1* and *cis3* of *OsMADS27* promoter were enriched in *OsACTIN1**pro::OsNLP4-GFP* plants by anti-GFP antibodies as shown in qRT-PCR analyses. Values are mean  $\pm$  SD (n=3 replicates). Different letters denote significant differences ( $P < 0.05$ ) from Duncan's multiple range tests.
- C. EMSA assay. Recombinant MBP-NLP4 protein was purified from *E. coli* cells and used for DNA binding assays with the promoter of *OsMADS27*. Competition for OsNLP4 binding was conducted with 5 $\times$ , 10 $\times$ , 50 $\times$  unlabeled *OsMADS27* probes. Shifted bands are indicated by asterisk.



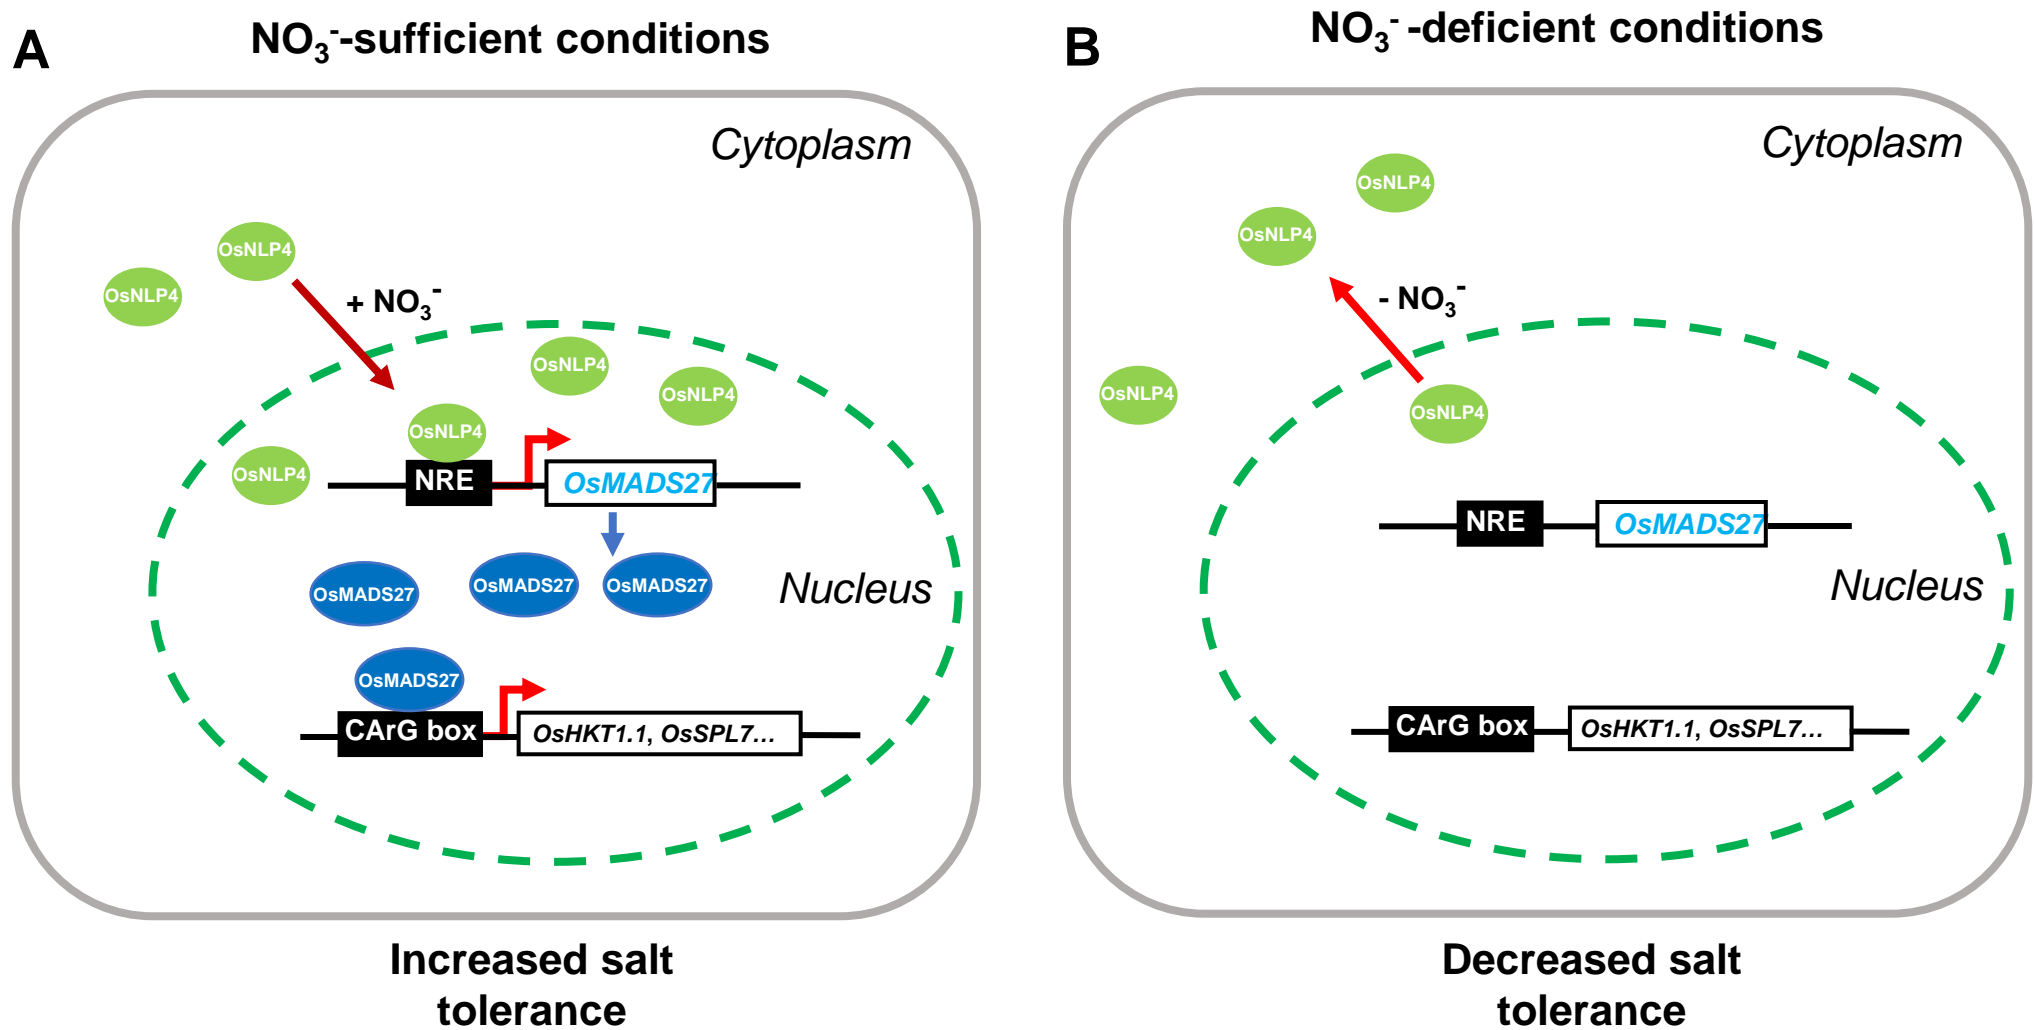

**Figure 7. A working model of nitrate-dependent salt tolerance mediated by OsNLP4-OsMADS27 module.**

- A. Under nitrate sufficient condition, nitrate triggers OsNLP4 production and nuclear localization, consequently activating the expression of *OsMADS27*, leading to high level of OsMADS27 that directly binds to the promoters of its target genes such as *OsHKT1.1* and *OsSPL7*, significantly enhancing their expression and improving the salt tolerance of rice.
- B. Under nitrate deficient condition, less OsNLP4 protein is produced and the vast majority of OsNLP4 protein is localized in the cytoplasm, resulting in a relatively low expression of *OsMADS27*, thereby attenuating the downstream salt tolerance-related genes.
